# Supplementary material for: In roots of Arabidopsis thaliana, the damage-associated molecular pattern AtPep1 is a stronger elicitor of immune signalling than flg22 or the chitin heptamer
Source: PubMed Central journal article supplement (PMC5626561; doi:10.1371/journal.pone.0185808), 2017-10-03

**S3 Fig. Effects of elicitors on the expression of *promoter::YFP<sub>N</sub>* in the root.**

Roots were analysed following treatment with 100 nM flg22, chi7, AtPep1 or 0.5x MS as control. Scale bar 100  $\mu$ m. Signal amplification might differ between developmental zones (S5 Fig).

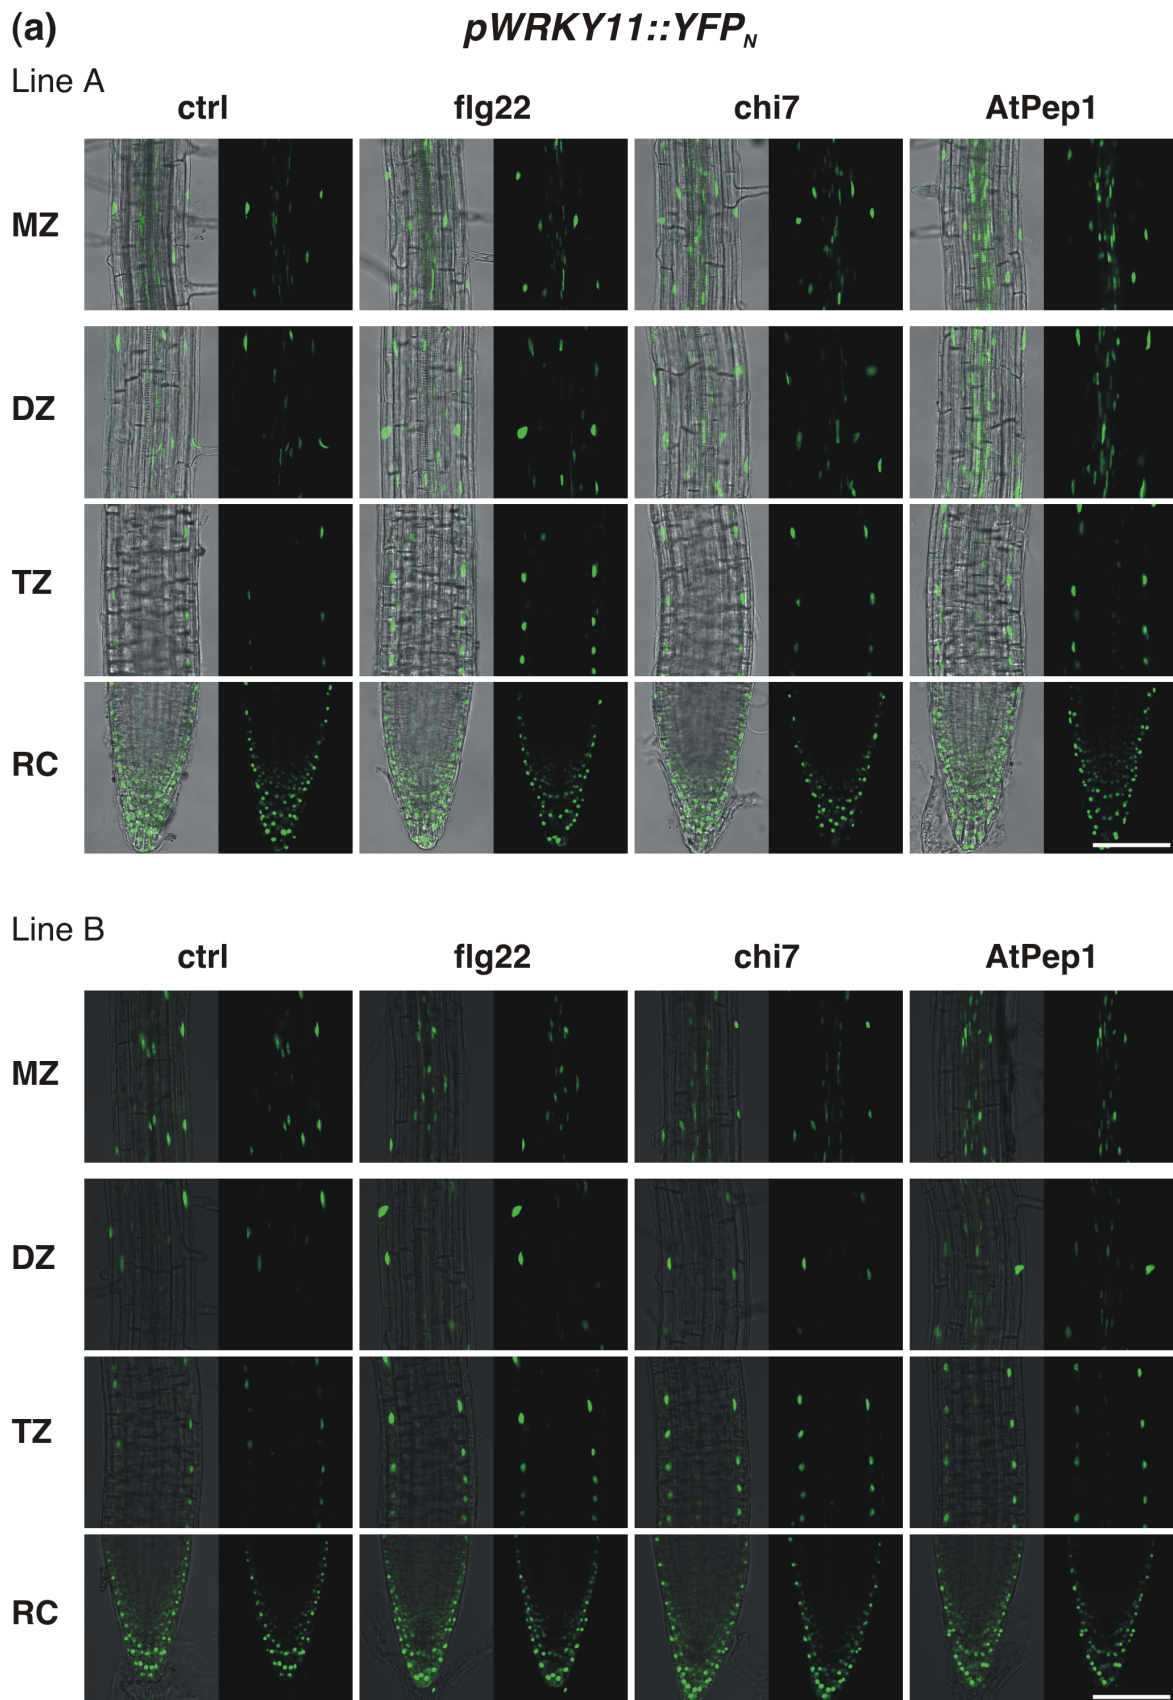

**(b)** *pMYB51::YFP<sub>N</sub>*

Line A

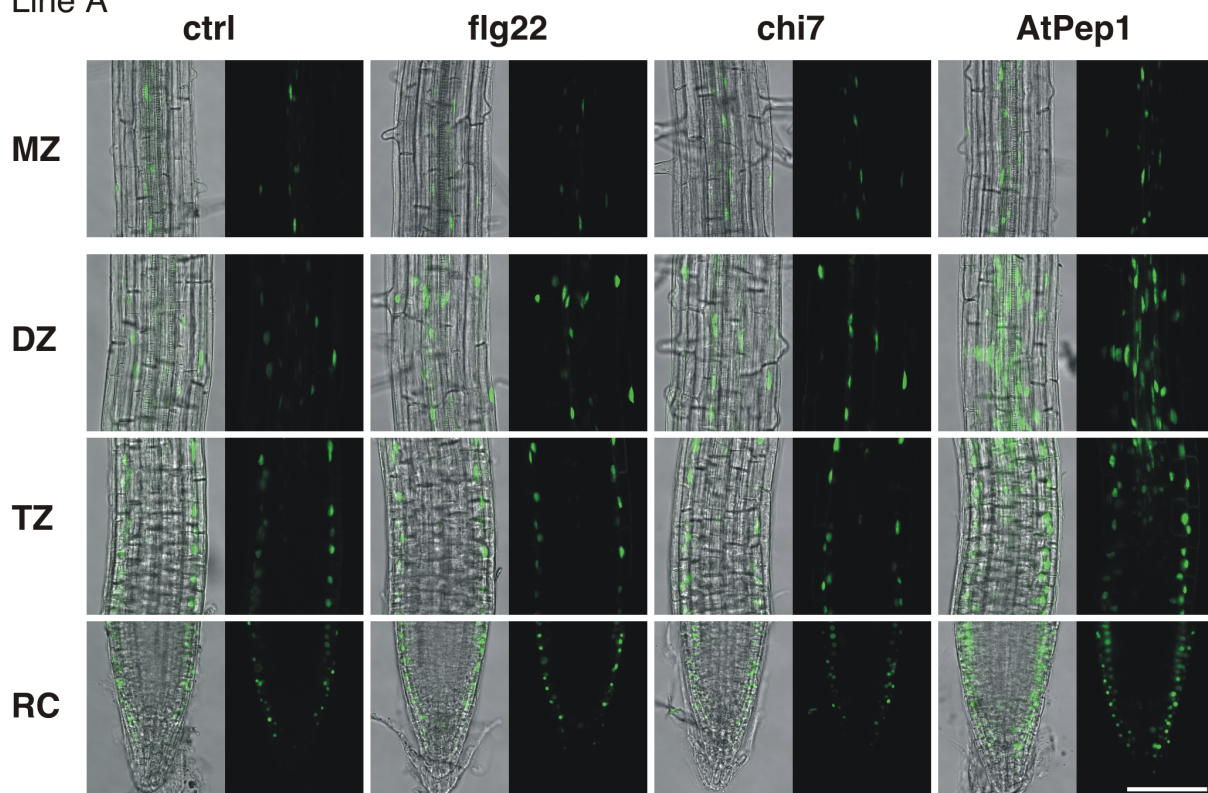

Line B

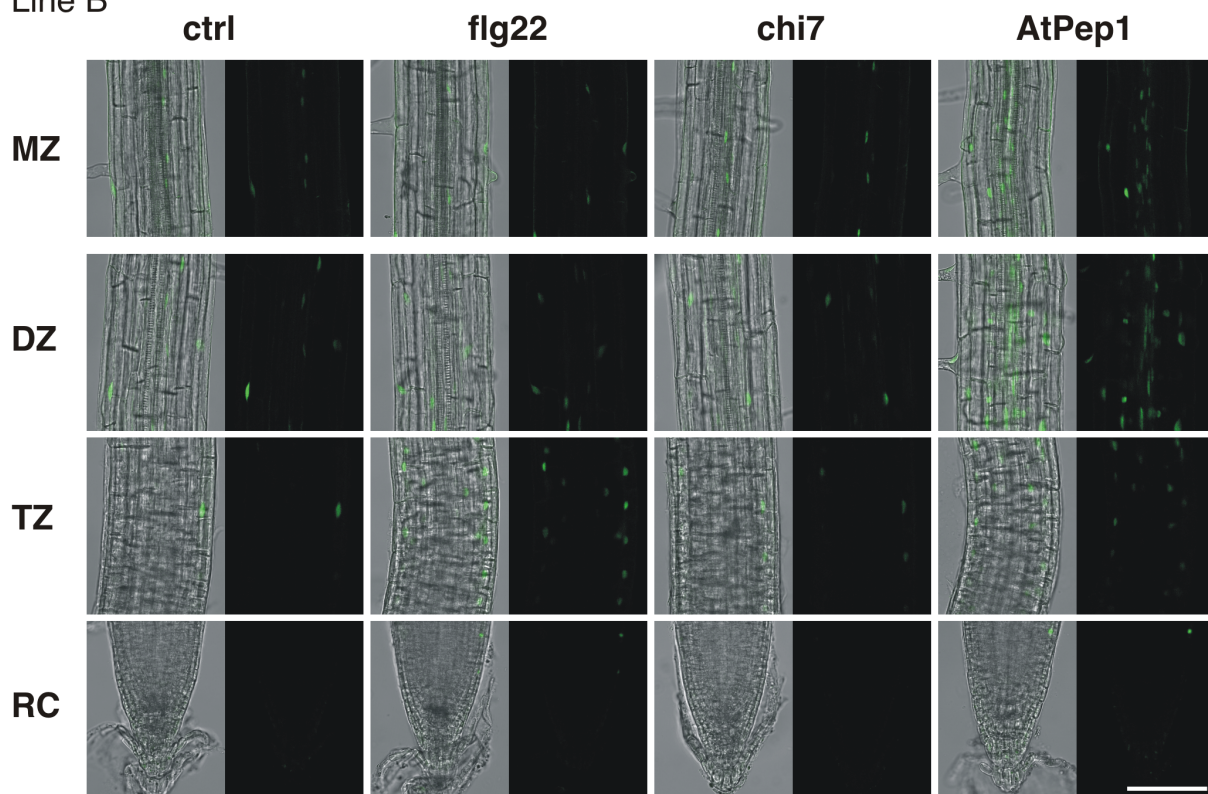

(c1)

*pACS6::YFP<sub>N</sub>*

Line A

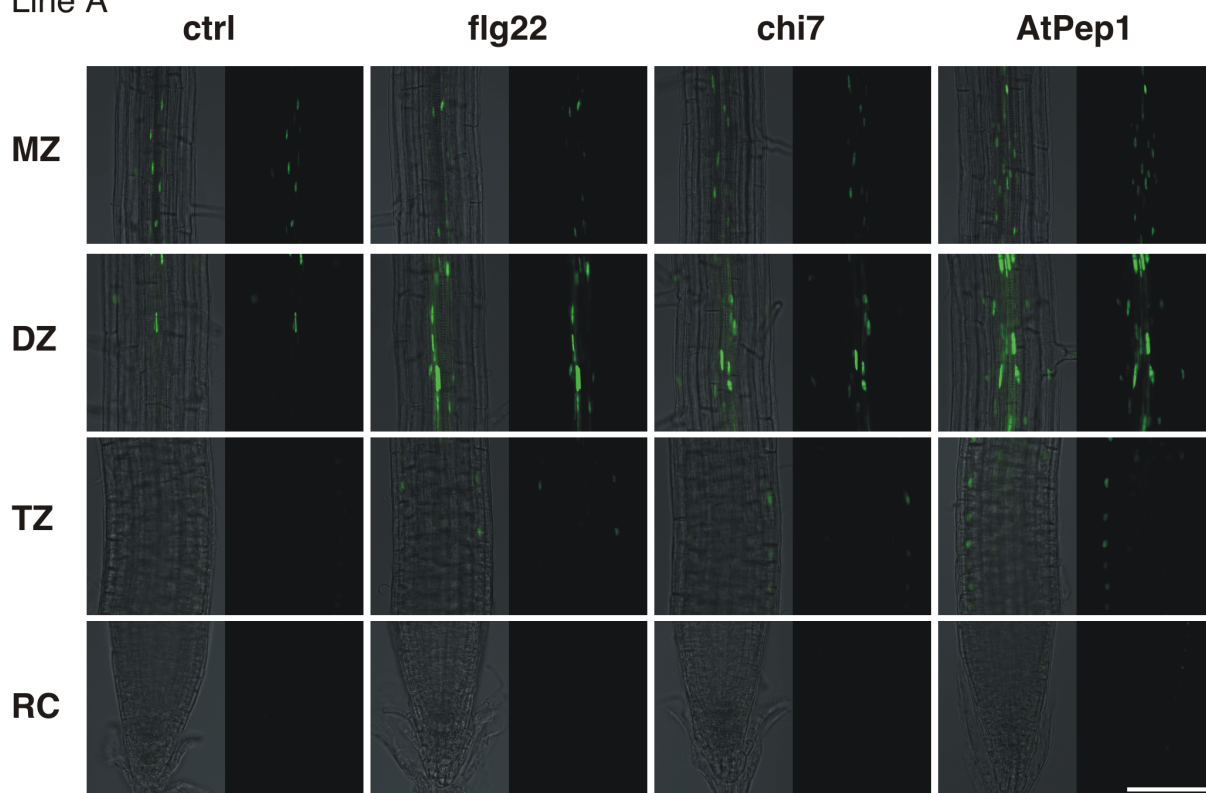

Line B

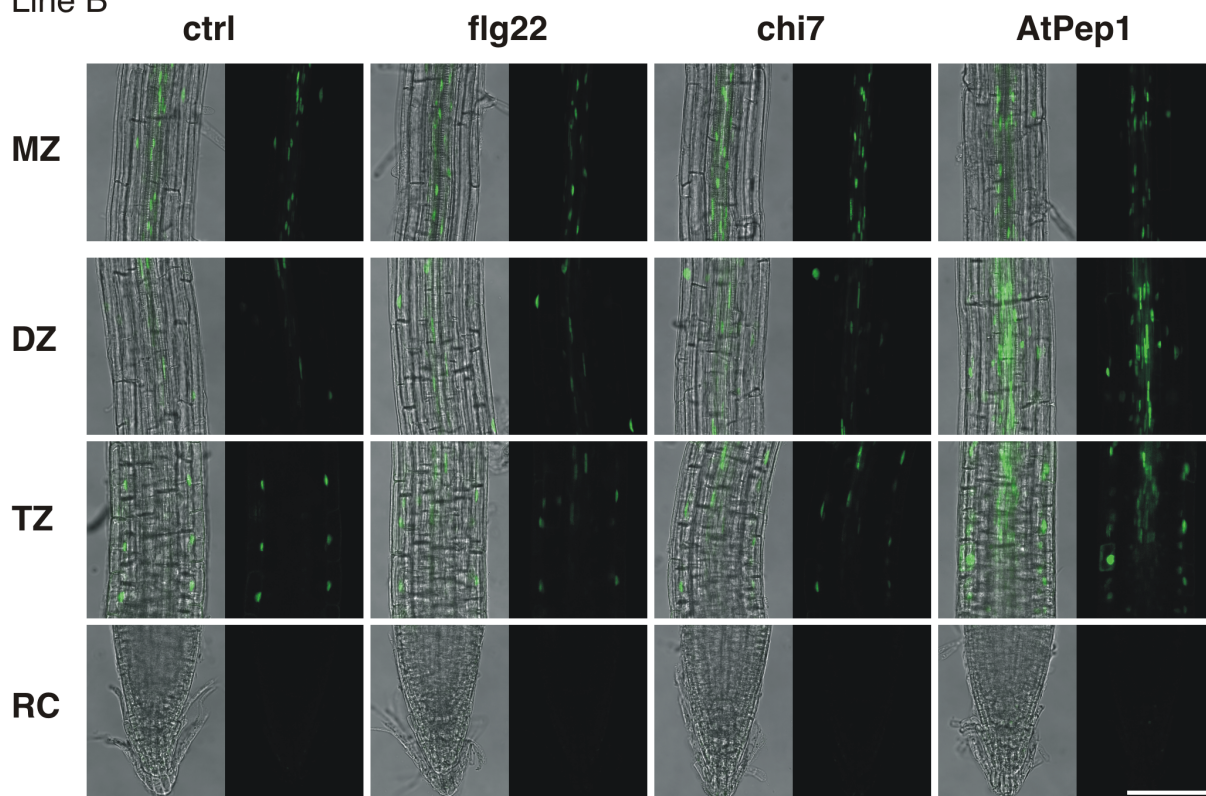

(c2)

*pACS6::YFP<sub>N</sub>*

Line C

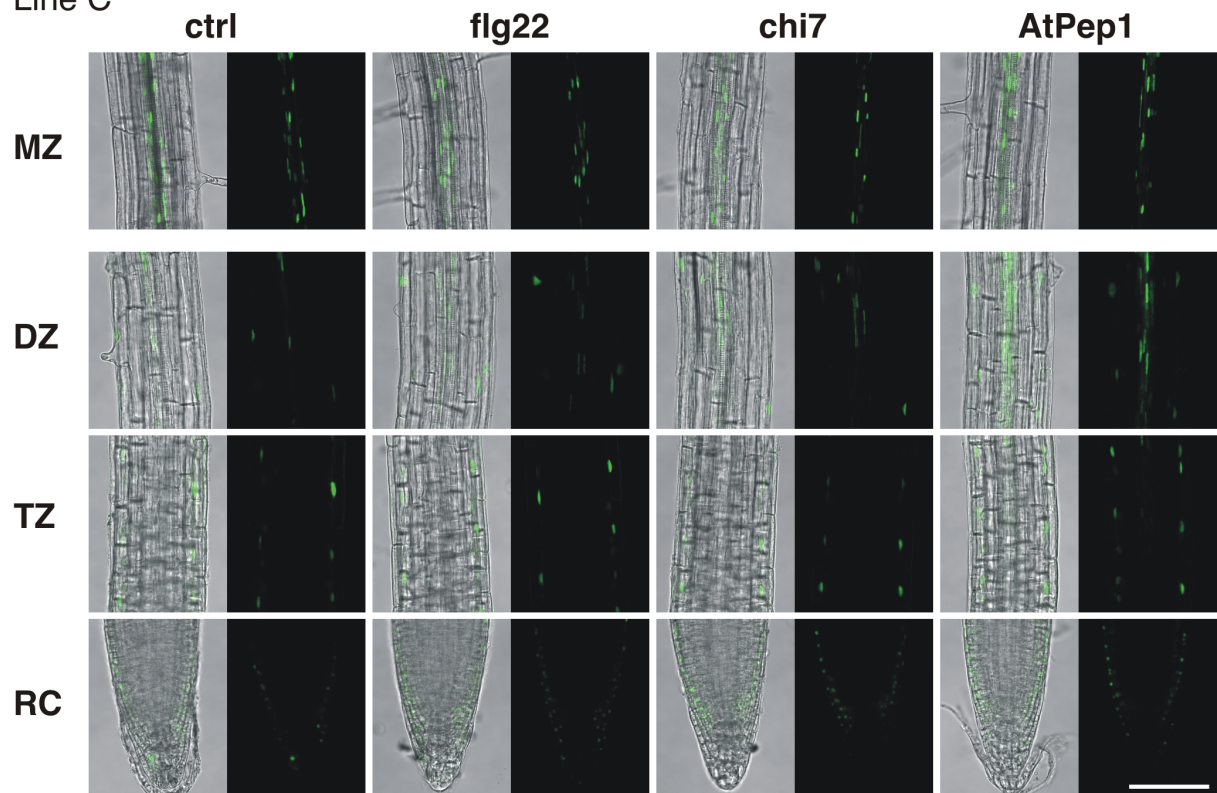

**(d)** *pAOS::YFP<sub>N</sub>*

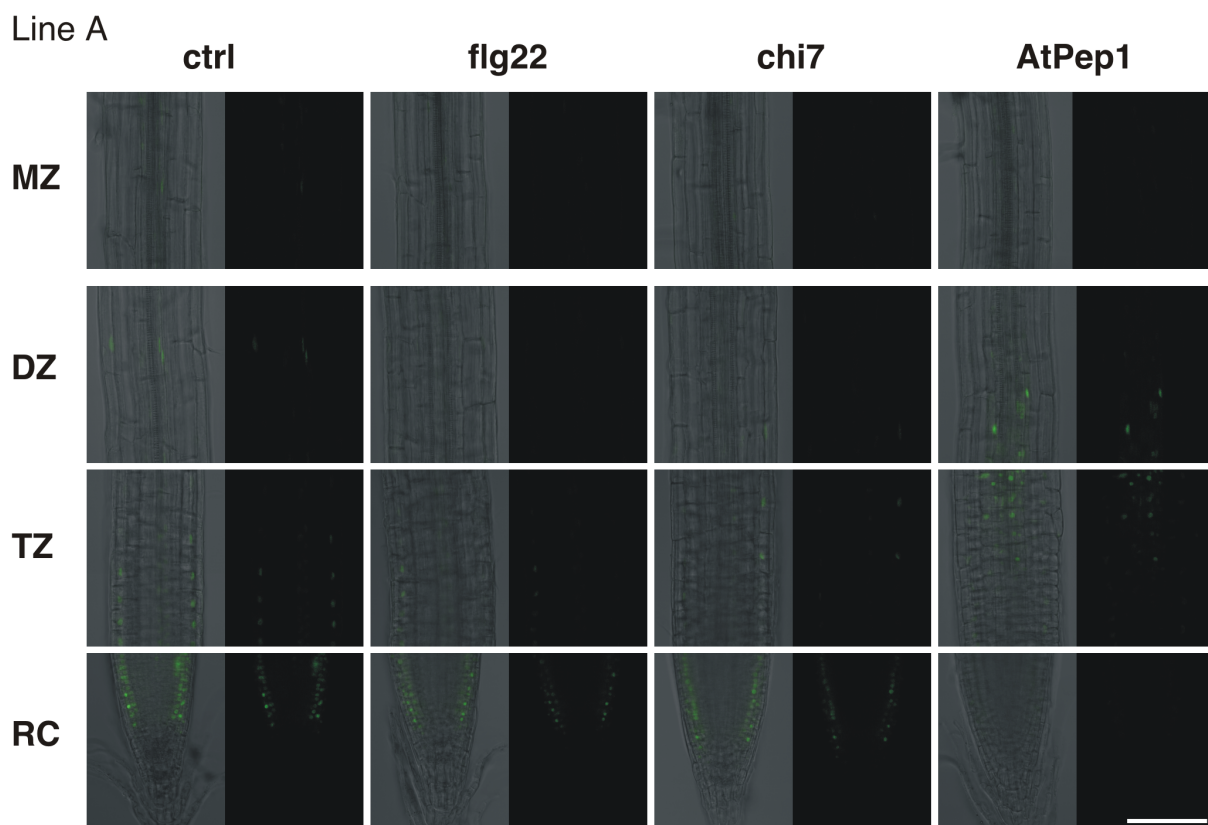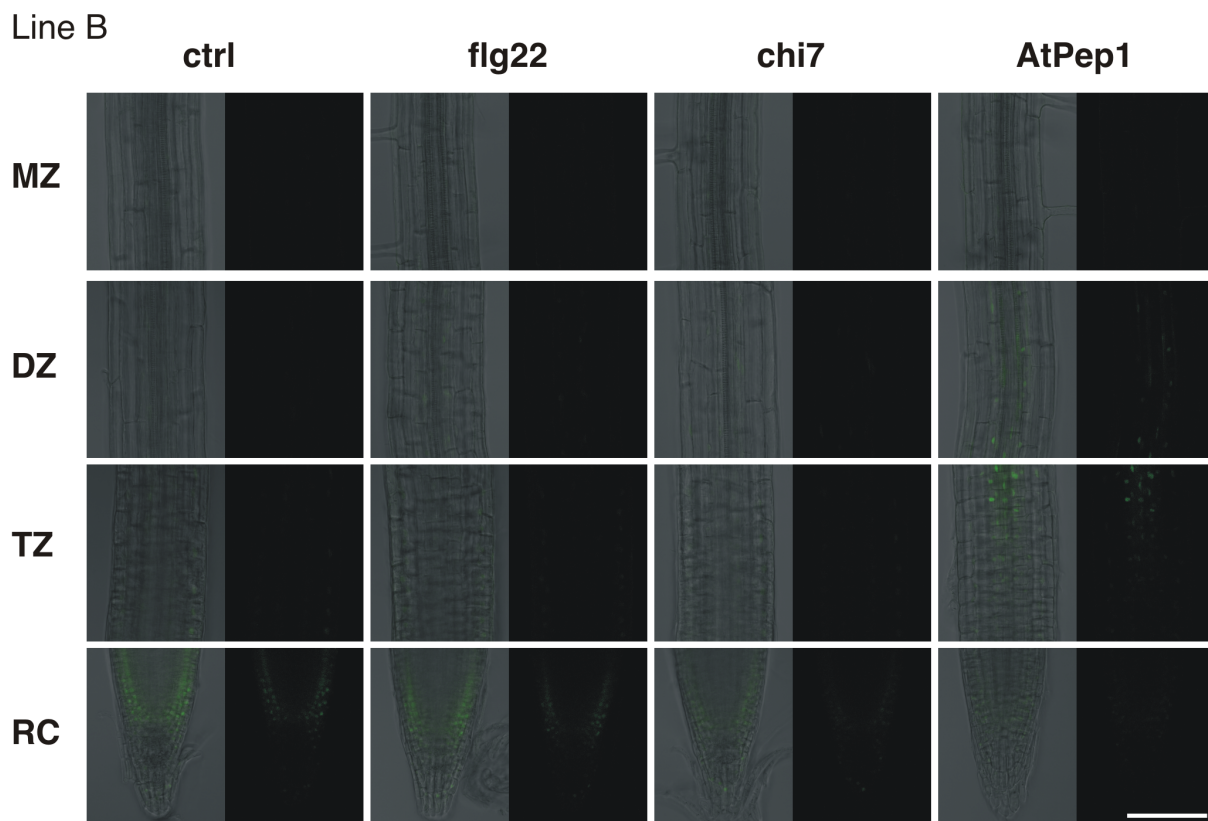

(e1)

*pHEL::YFP<sub>N</sub>*

Line A

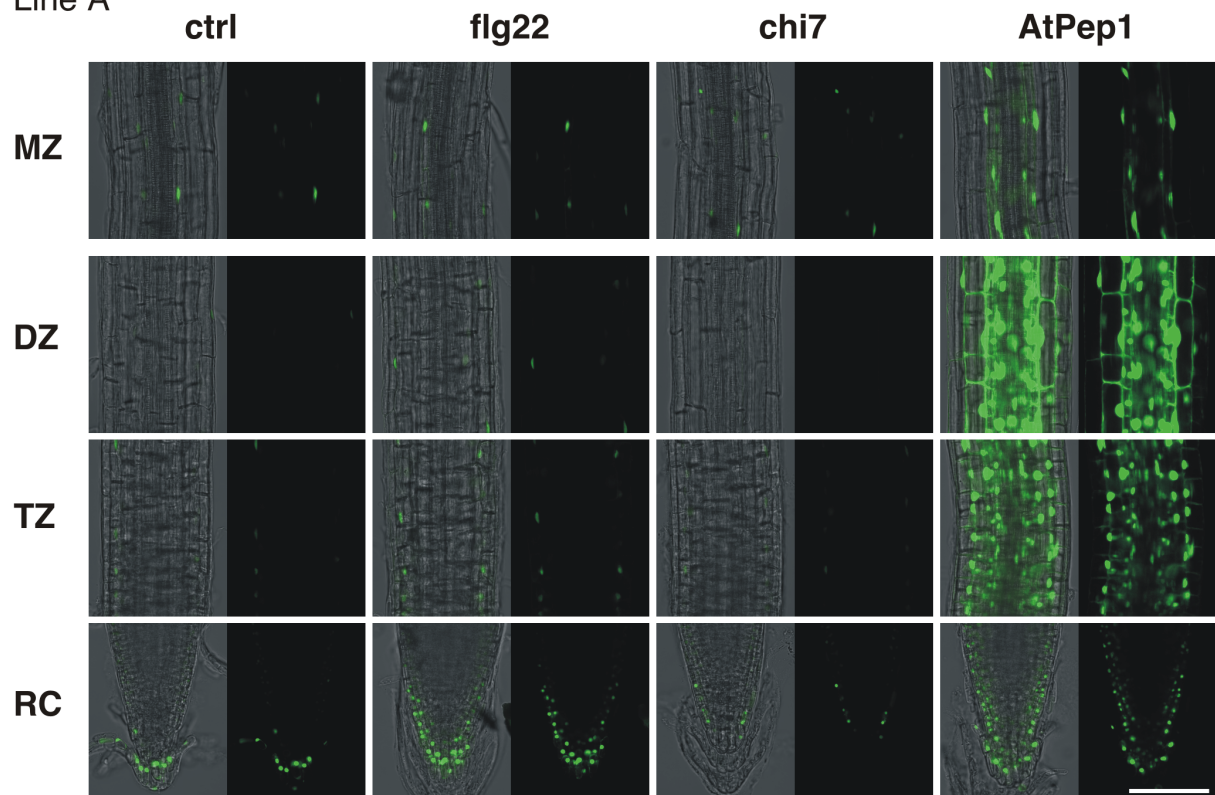

Line B

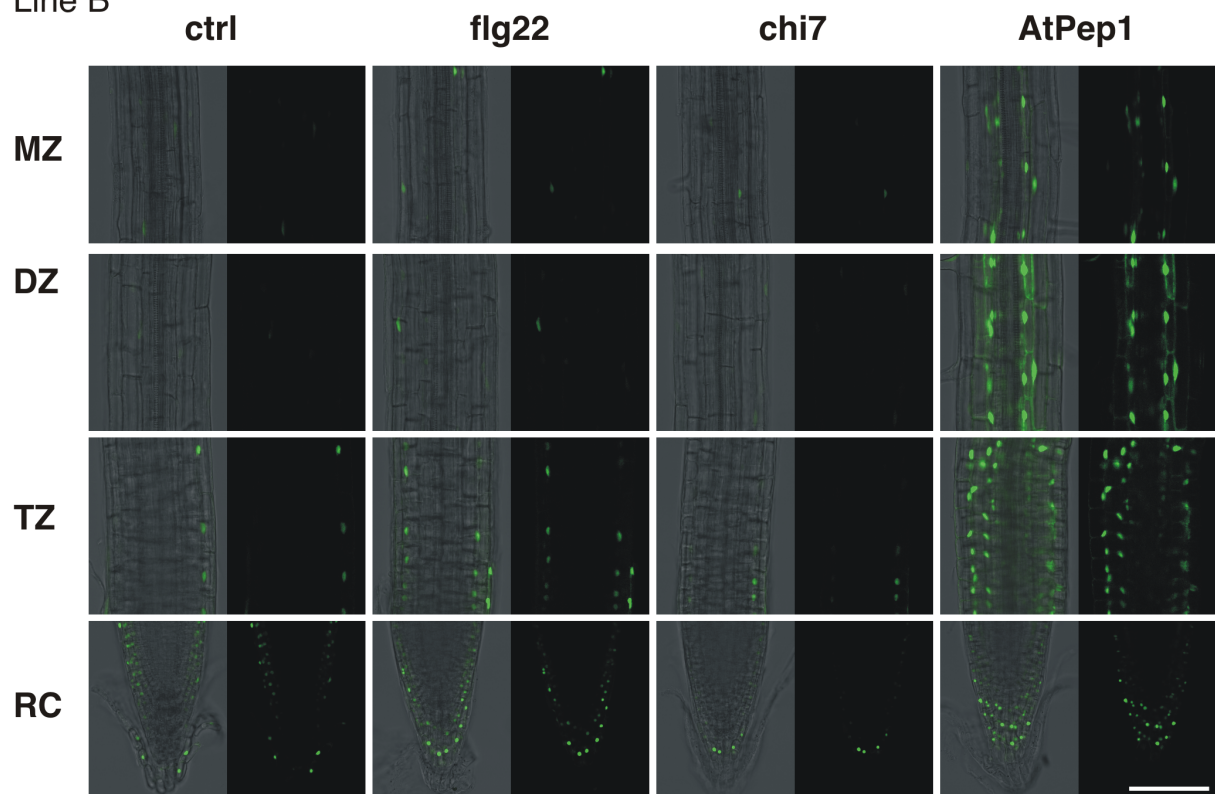

(e2)

*pHEL::YFP<sub>N</sub>*

Line C

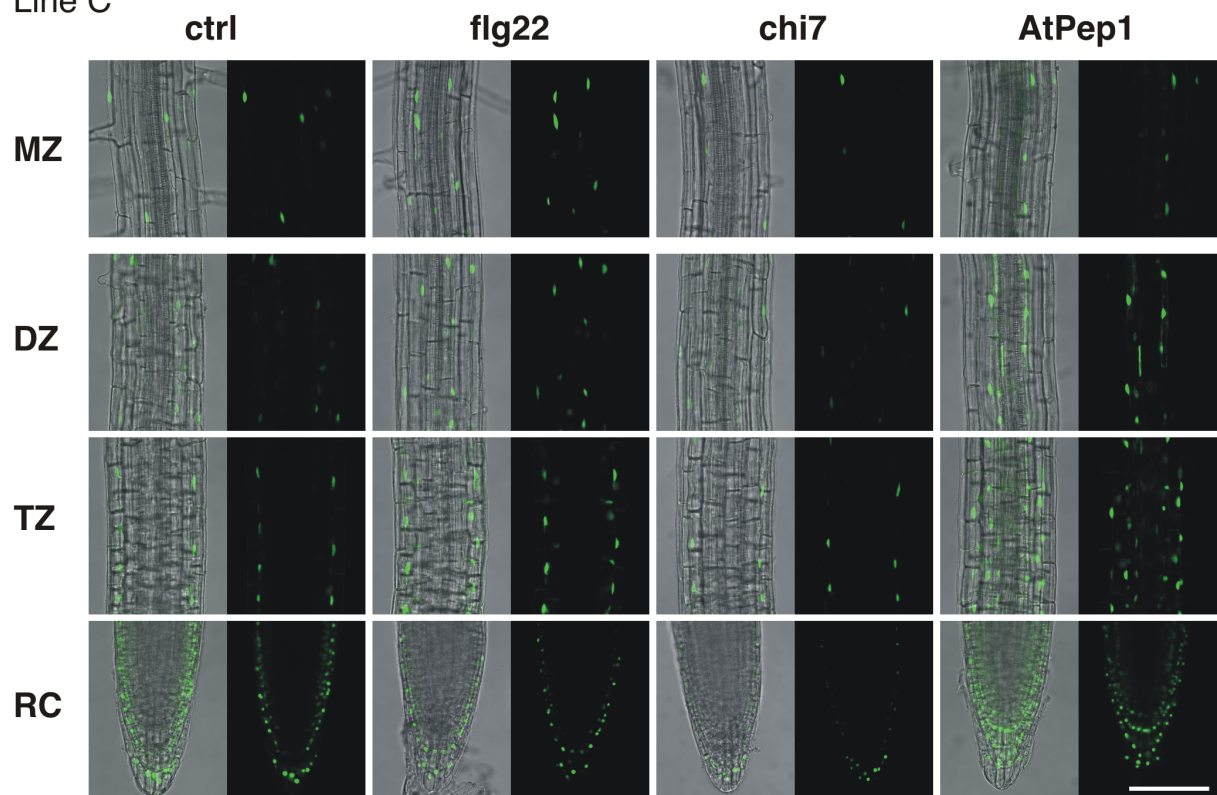

(f) *pZAT12::YFP<sub>N</sub>*

Line A

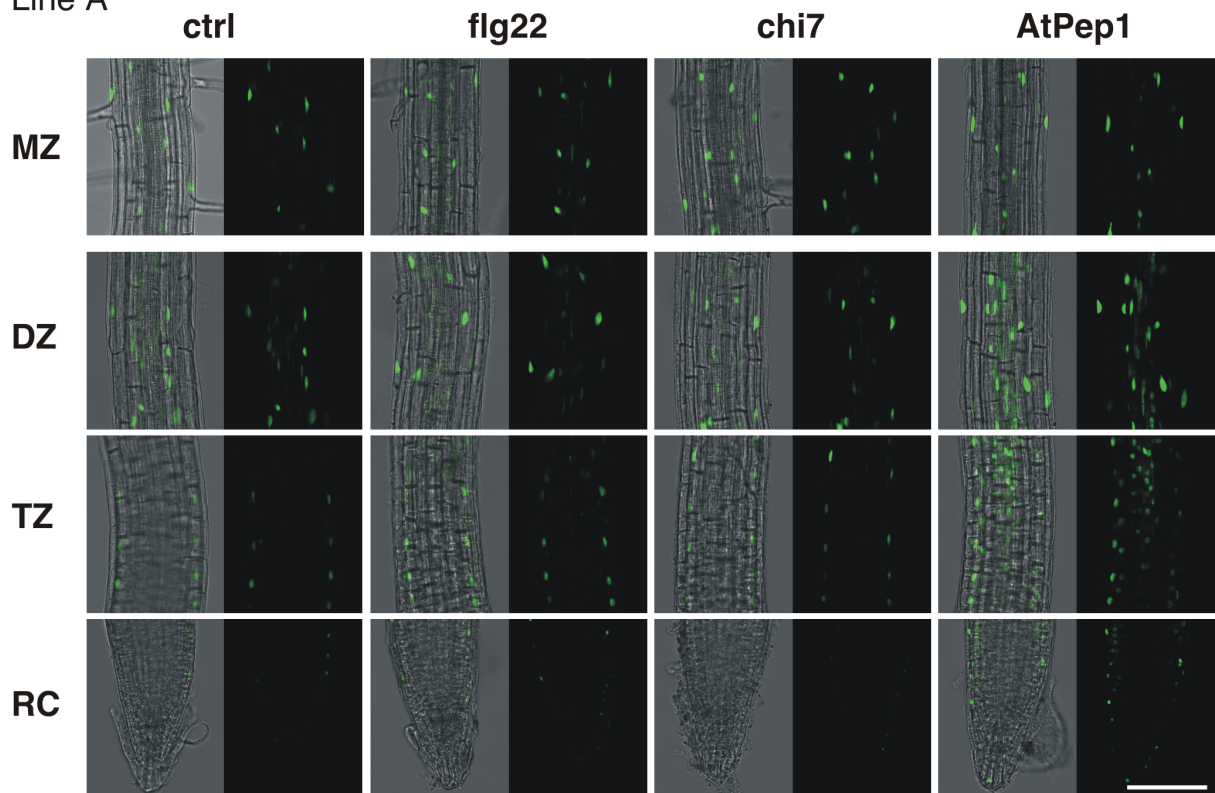

Line B

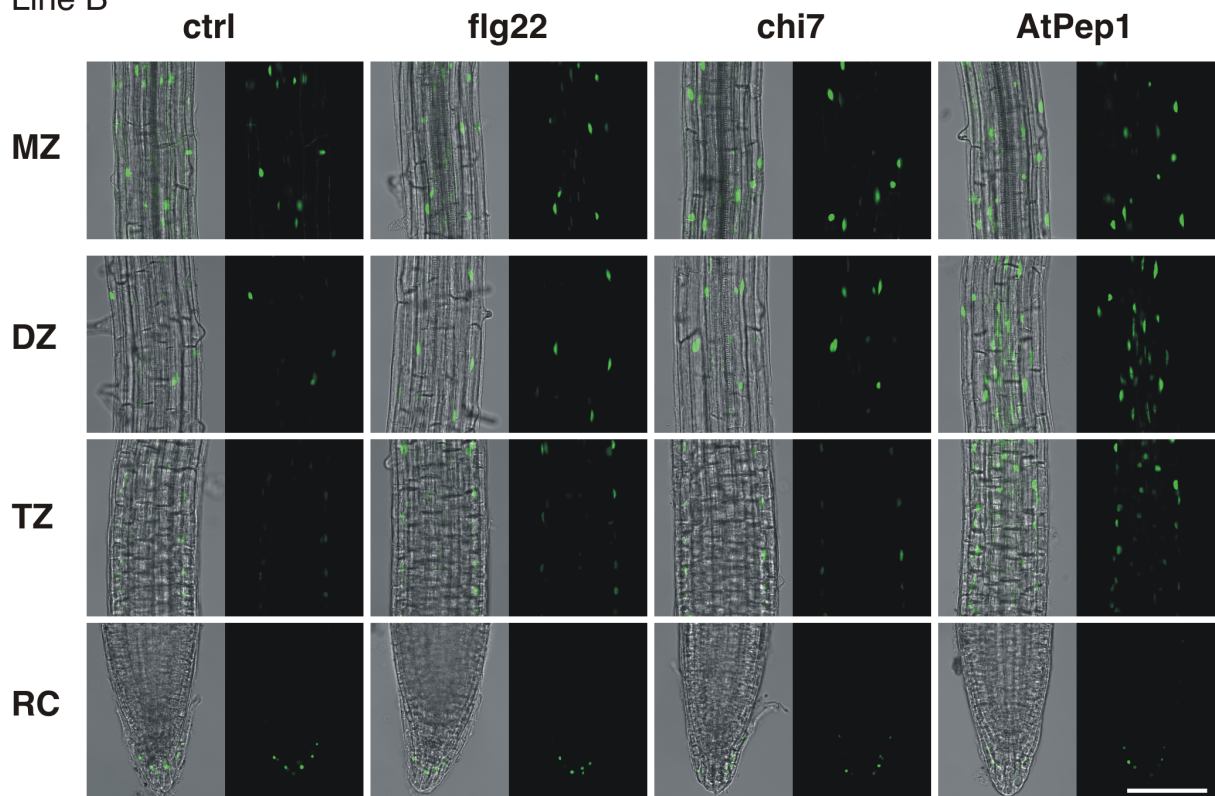



(g) *pPER5::YFP<sub>N</sub>*

Line A

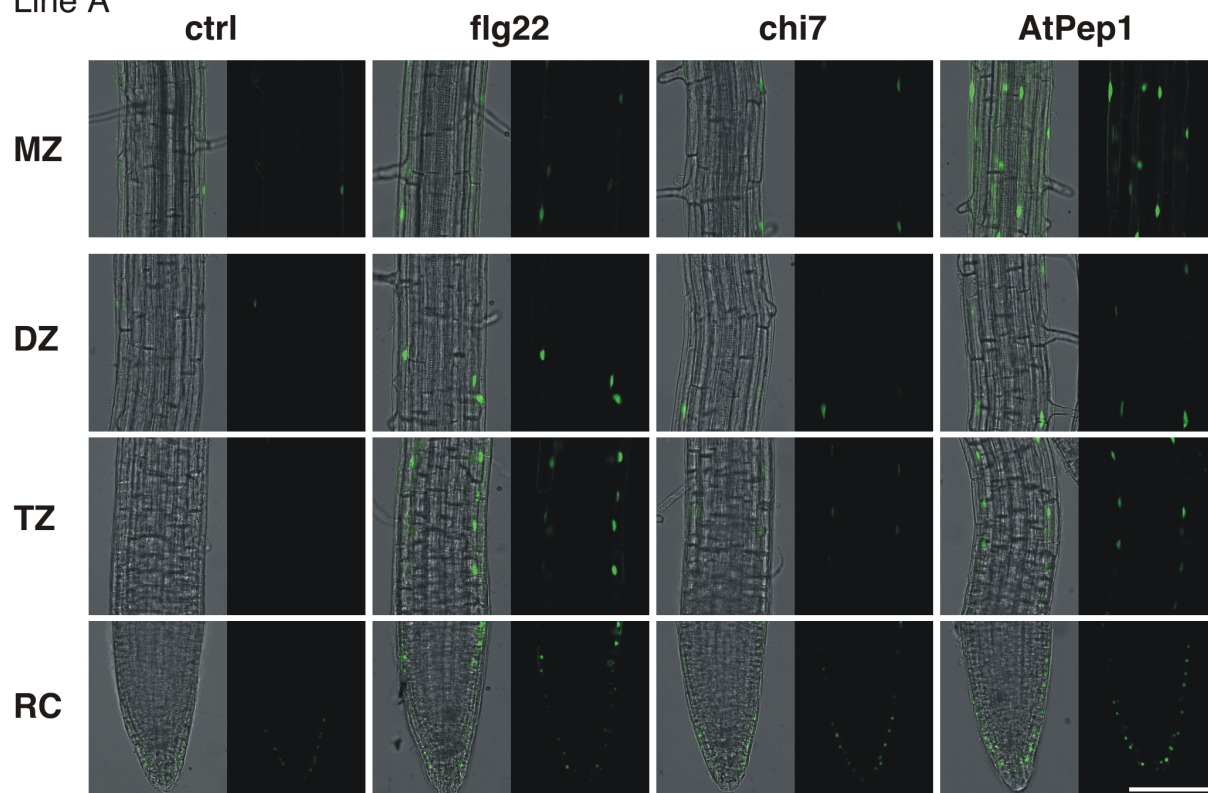

Line B

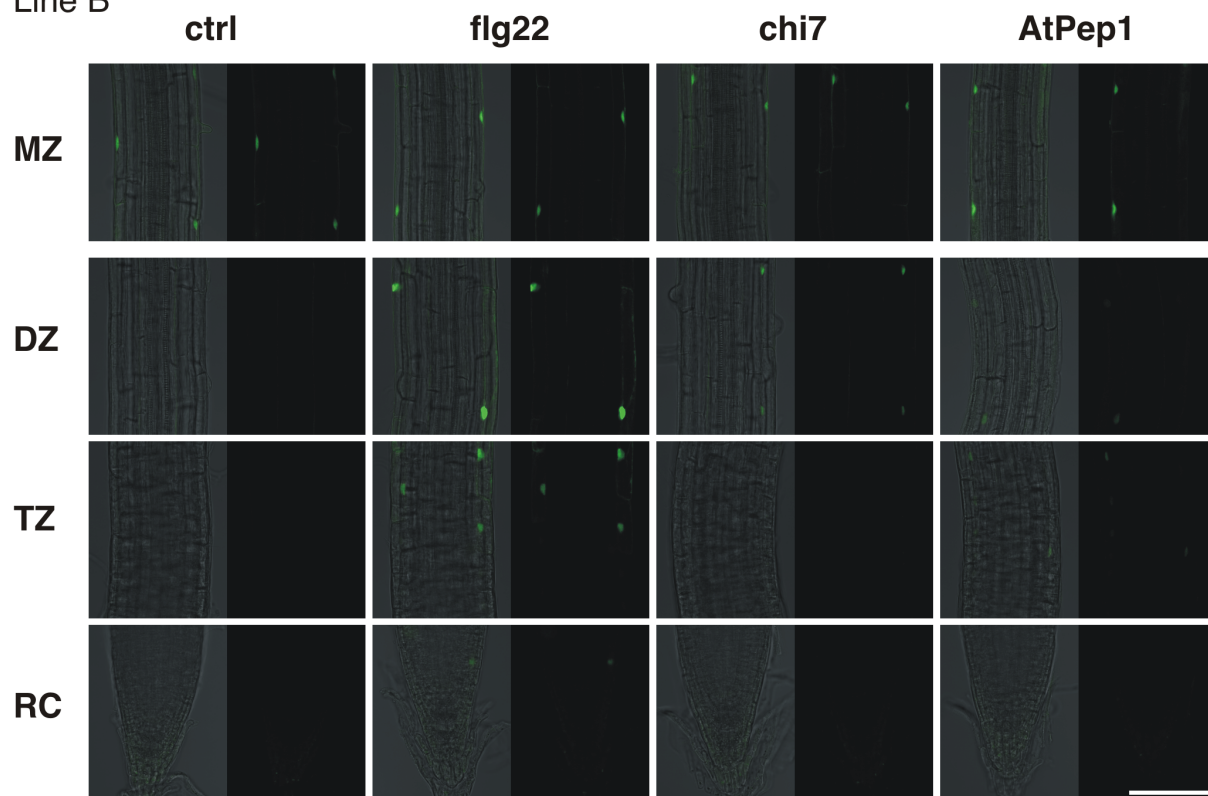

(h) *pICS1::YFP<sub>N</sub>*

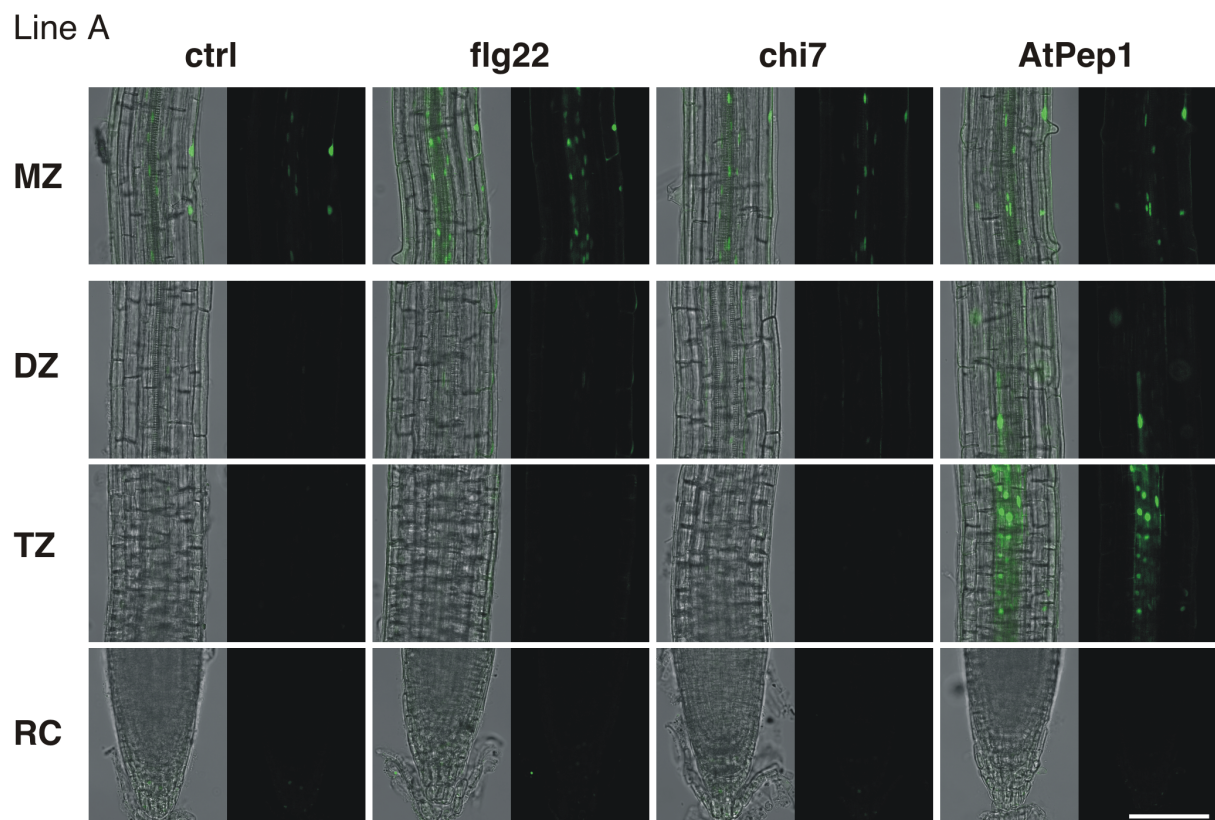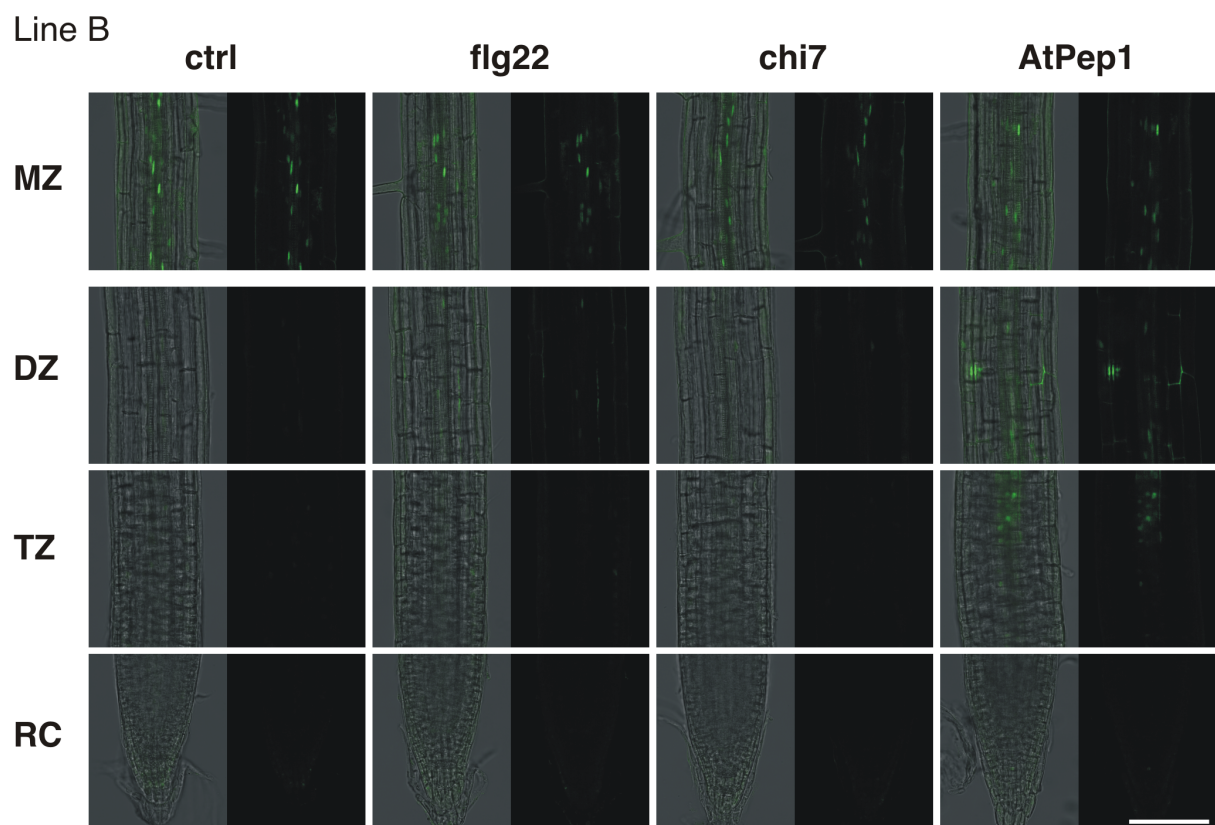

(i) *pPR1::YFP<sub>N</sub>*

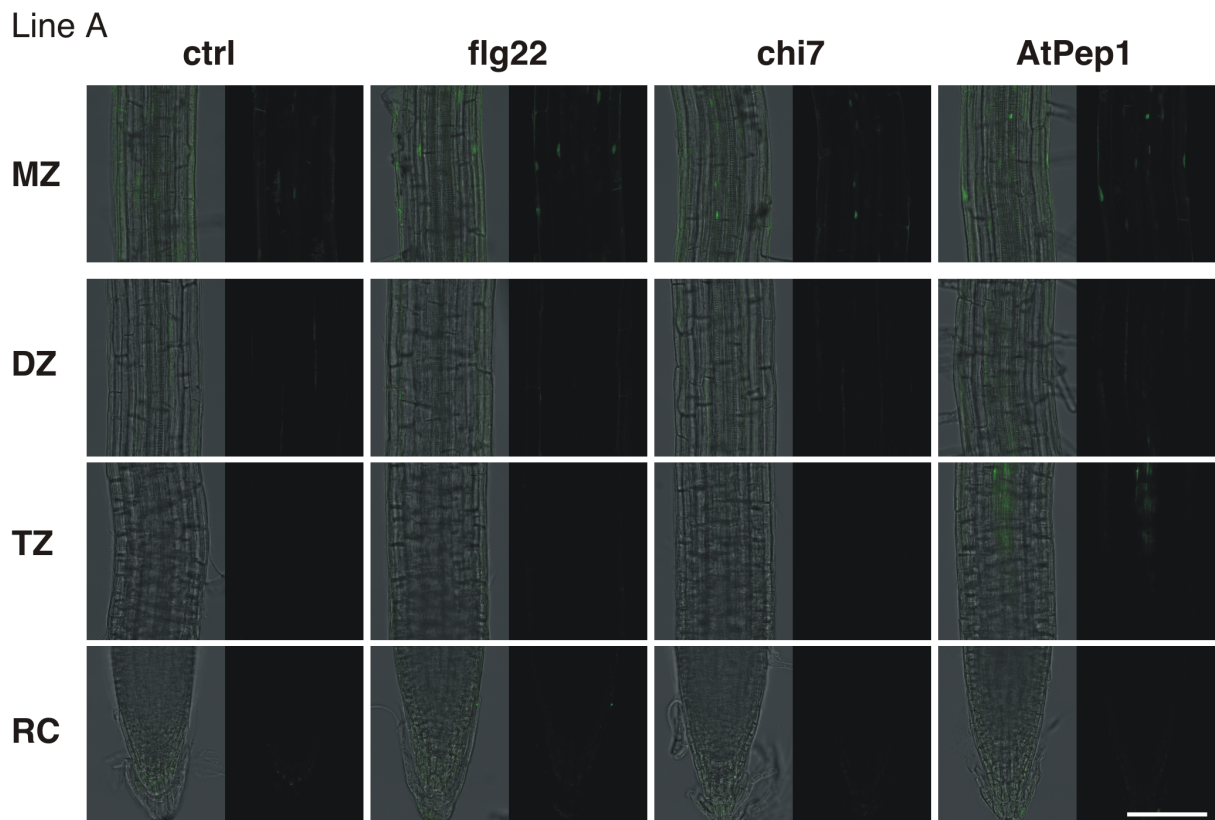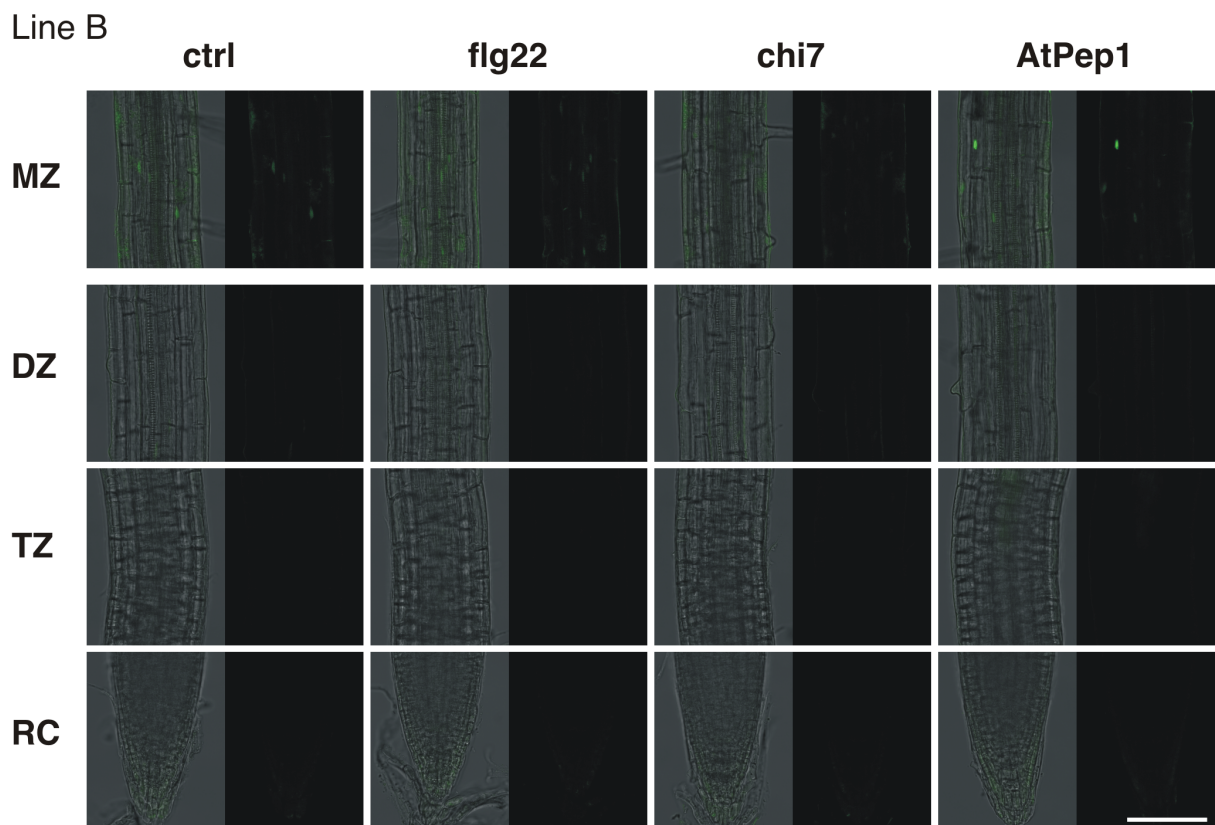

Supplement: pone.0185808.s004.pdf [file pone.0185808.s004.pdf]
