# Supplementary material for: In roots of Arabidopsis thaliana, the damage-associated molecular pattern AtPep1 is a stronger elicitor of immune signalling than flg22 or the chitin heptamer
Source: PubMed Central journal article supplement (PMC5626561; doi:10.1371/journal.pone.0185808), 2017-10-03
Supplement: pone.0185808.s001.pdf [file pone.0185808.s001.pdf]

**S1 Table: Primer sequences.**

*Promoter amplification for promoter::YFP<sub>N</sub> constructs*

|                                 |                                                                                        |
|---------------------------------|----------------------------------------------------------------------------------------|
| <i>pWRKY11::YFP<sub>N</sub></i> | fw 5' ATTGGGTACCCTTCCCCACCCATATATAGCCA 3'<br>rv 5' GCCCGGTACCGATGATTTCTTGGTCTGAGGAT 3' |
| <i>pMYB51::YFP<sub>N</sub></i>  | fw 5' ATTGGGTACCTGTACTAAAGAACTACTGTAA 3'<br>rv 5' GCCCGGTACCTCTTGATTCTTCAAACCTTAGCT 3' |
| <i>pACS6::YFP<sub>N</sub></i>   | fw 5' ATTTGGTACCATGTCAACTAAAACCG 3'<br>rv 5' AAGCGGTACCTTTTTGTTTCTTCTTTA 3'            |
| <i>pAOS::YFP<sub>N</sub></i>    | fw 5' ATTGGGTACCGAAAACCTGGTAAGCTT 3'<br>rv 5' GCCCGGTACCCTATTCGAAACAGTGG 3'            |
| <i>pHEL::YFP<sub>N</sub></i>    | fw 5' TAAGGGTACCTAAATGACATGAGATG 3'<br>rv 5' TGATGGTACCGATCGATAAGTCTTTG 3'             |
| <i>pZAT12::YFP<sub>N</sub></i>  | fw 5' GTGTGGTACCTTTTAGGCTCGTAAAG 3'<br>rv 5' TCGCGGTACCTTTTCTTCTGATGATG 3'             |
| <i>pPER5::YFP<sub>N</sub></i>   | fw 5' AATGGTACCCTCAGTGCGTAGTAGTGAGT 3'<br>rv 5' AATGGTACCATTTGTAGATCTCACTTGGTATA 3'    |
| <i>pICS1::YFP<sub>N</sub></i>   | fw 5' CTTAGGTACCCAGACTCCAGAAGACGAC 3'<br>rv 5' GTGTGGTACCTGCAGAAATTCGTAAAGTG 3'        |
| <i>pPRI::YFP<sub>N</sub></i>    | fw 5' ATTAGGTACCAAGTCATTTACAAAG 3'<br>rv 5' TAACGGTACCTTTTCTAAGTTGATAATG 3'            |

*Analysis of gene expression by qPCR*

|               |                                                                              |
|---------------|------------------------------------------------------------------------------|
| <i>UBIQ10</i> | fw 5' GGCCTTGTATAATCCCTGATGAATAAG 3'<br>rv 5' AAAGAGATAACAGGAACGGAAACATAG 3' |
| <i>PER5</i>   | fw 5' TCTCAATGCTTCTTGTTCGG 3'<br>rv 5' CTAGATCCAATGCTGCCAGA 3'               |
| <i>MYB51</i>  | fw 5' CGAGGTTTCTTCACGAGGAT 3'<br>rv 5' CGTGGGATTCATCGATTATG 3'               |
