# Supplementary material for: In roots of Arabidopsis thaliana, the damage-associated molecular pattern AtPep1 is a stronger elicitor of immune signalling than flg22 or the chitin heptamer
Source: PubMed Central journal article supplement (PMC5626561; doi:10.1371/journal.pone.0185808), 2017-10-03

**S1 Fig. Time dependency of elicitor effects on *promoter::YFP<sub>N</sub>* expression in the root.**

Roots were analysed 4, 8 and 24 h after transfer to 0.5x MS medium with 100 nM flg22, chi7 or AtPep1 or without elicitor. MZ mature zone, DZ differentiation zone. Scale bar 200  $\mu$ m.

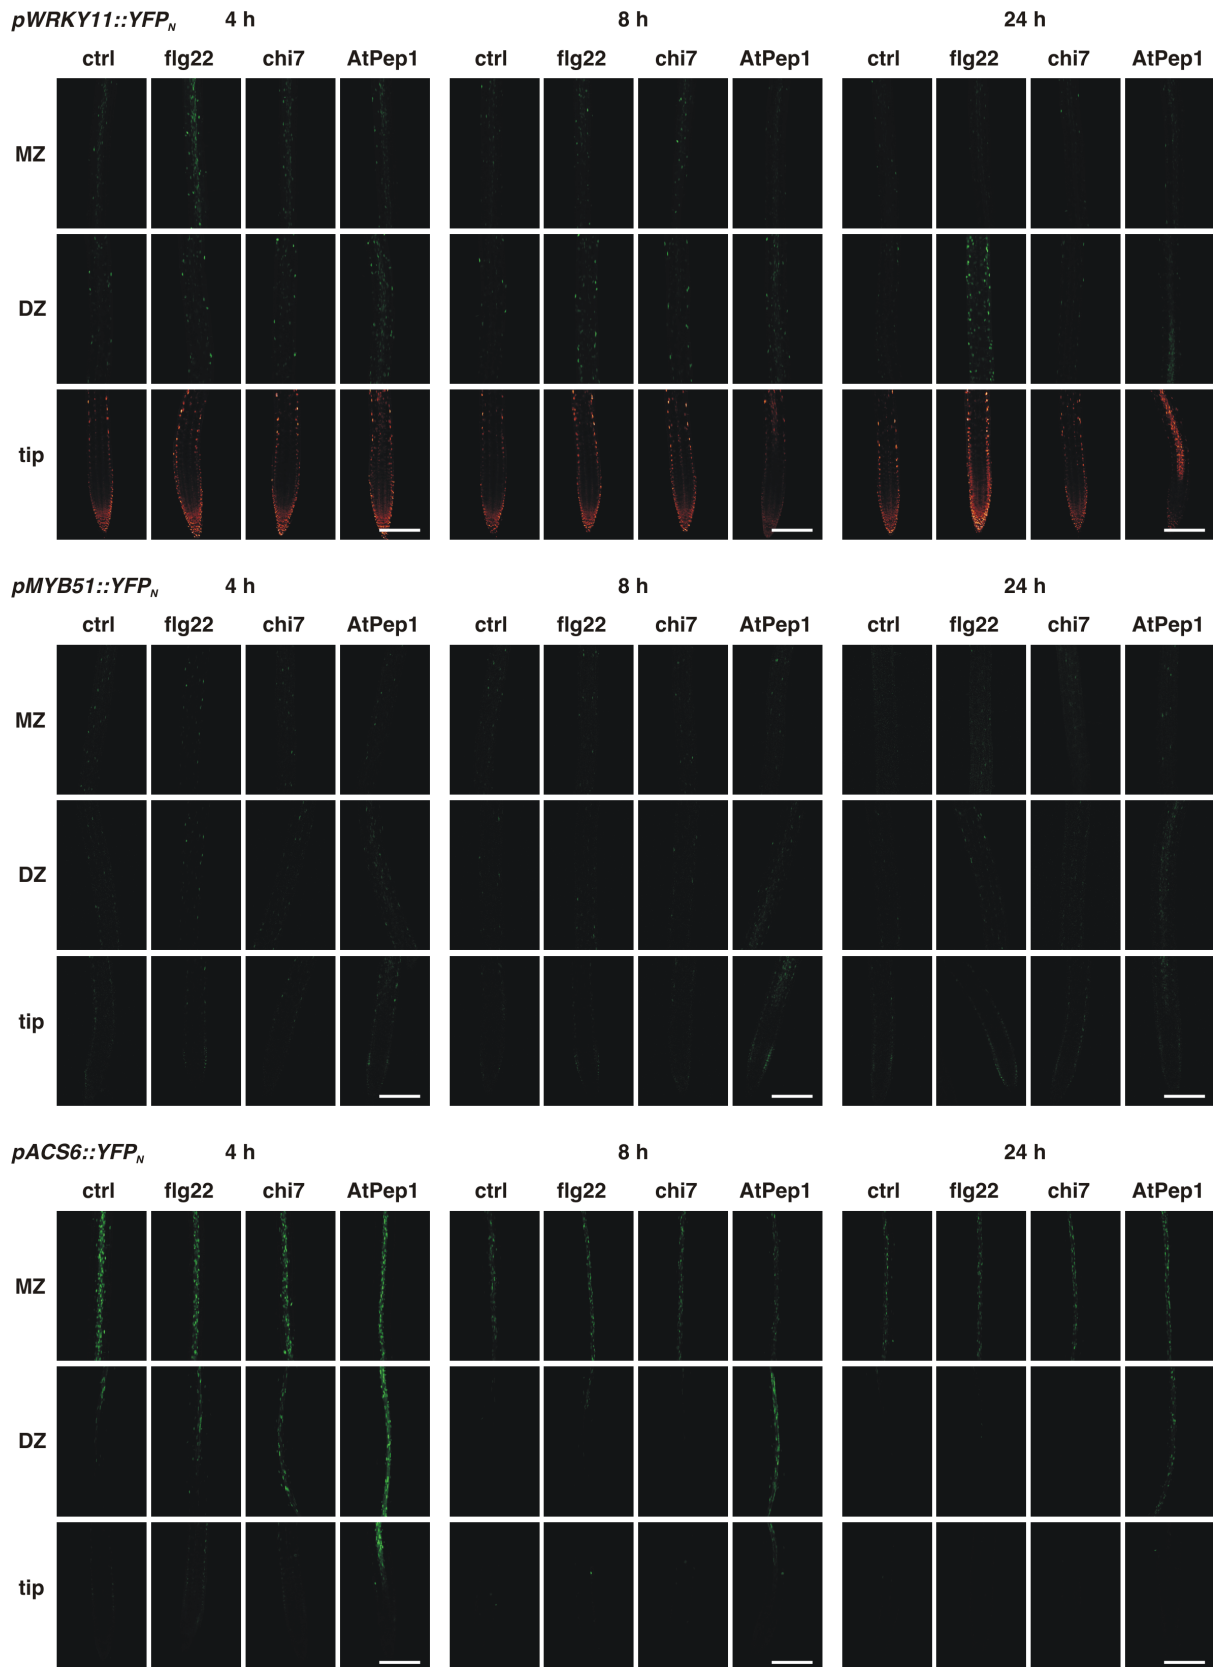

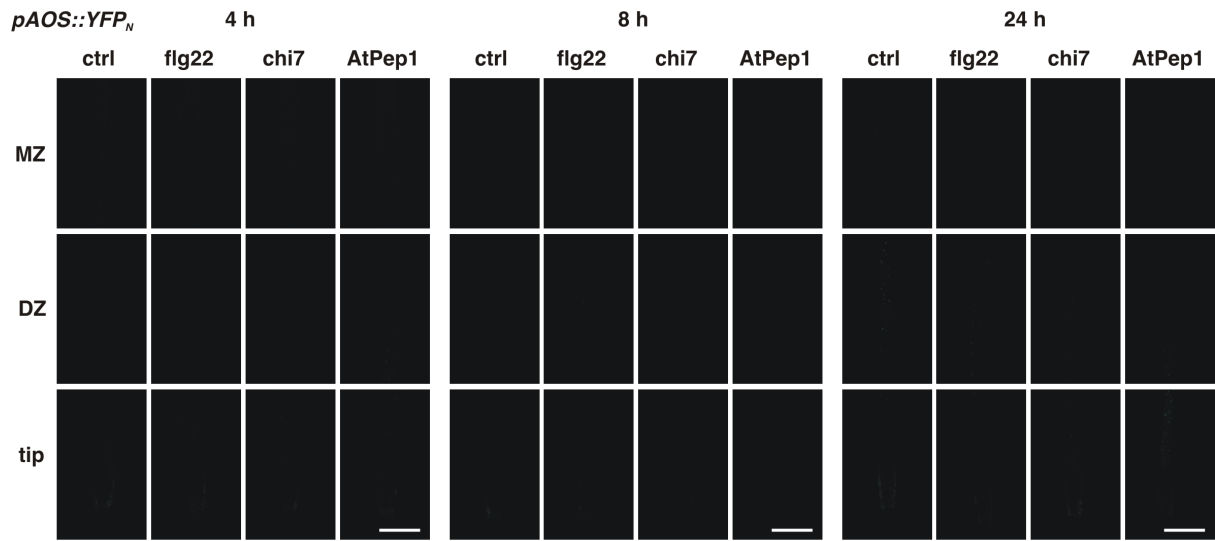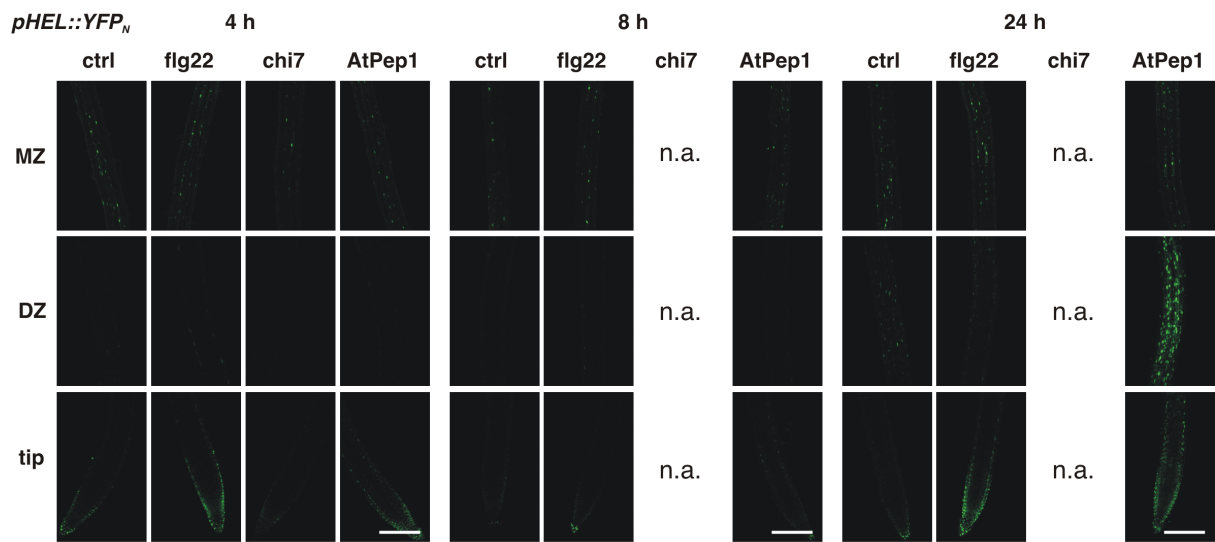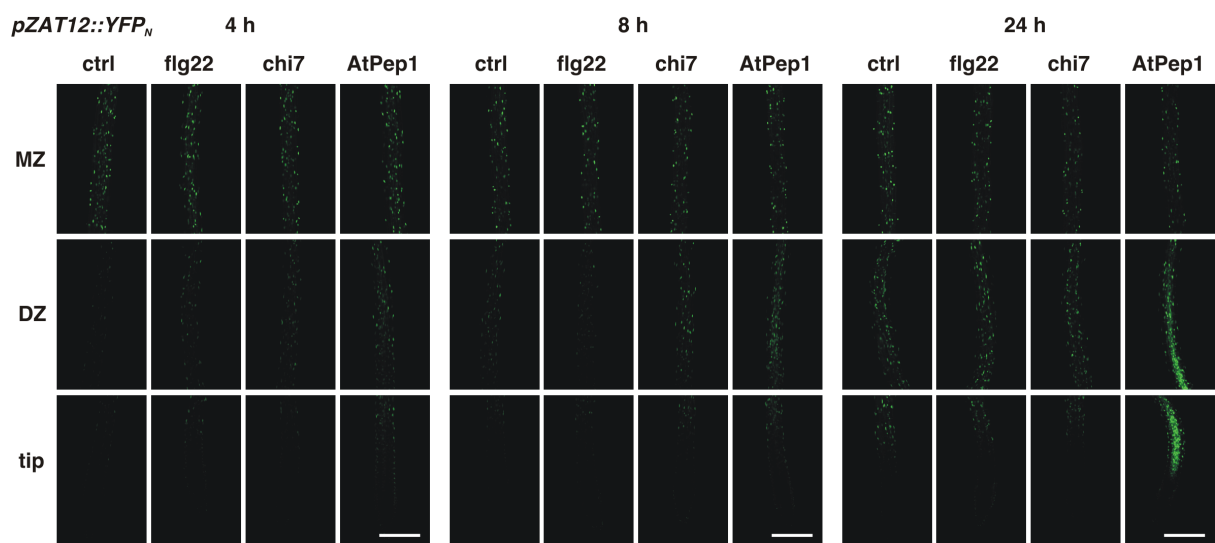

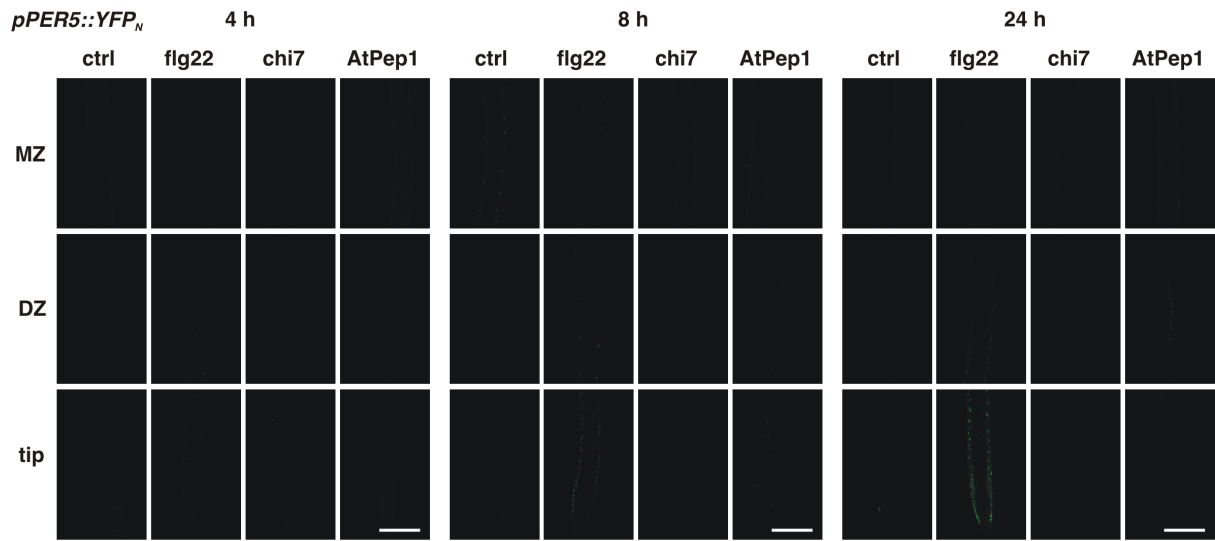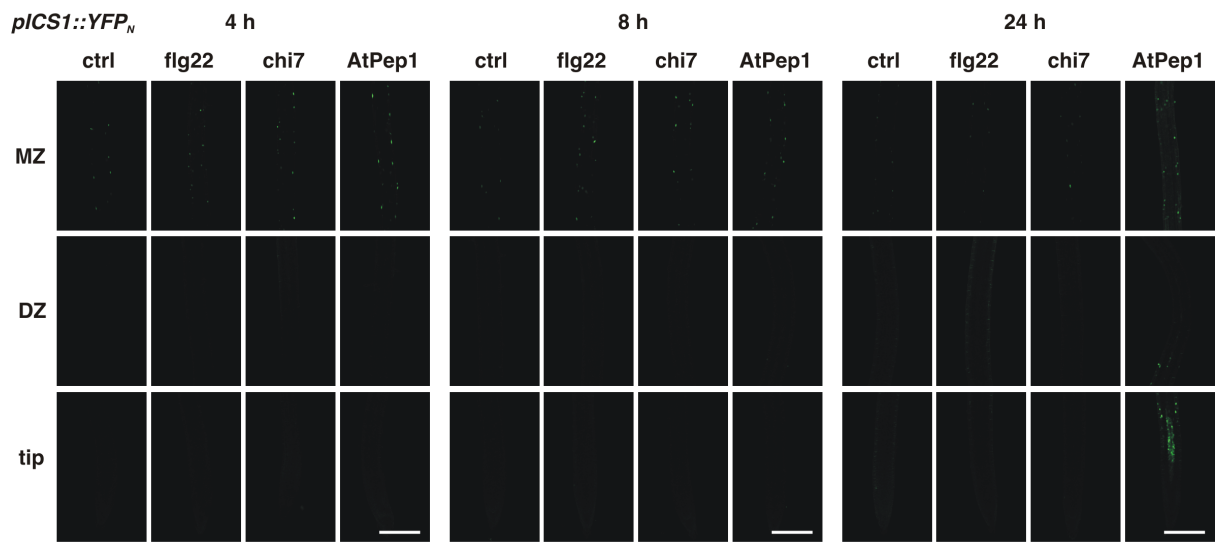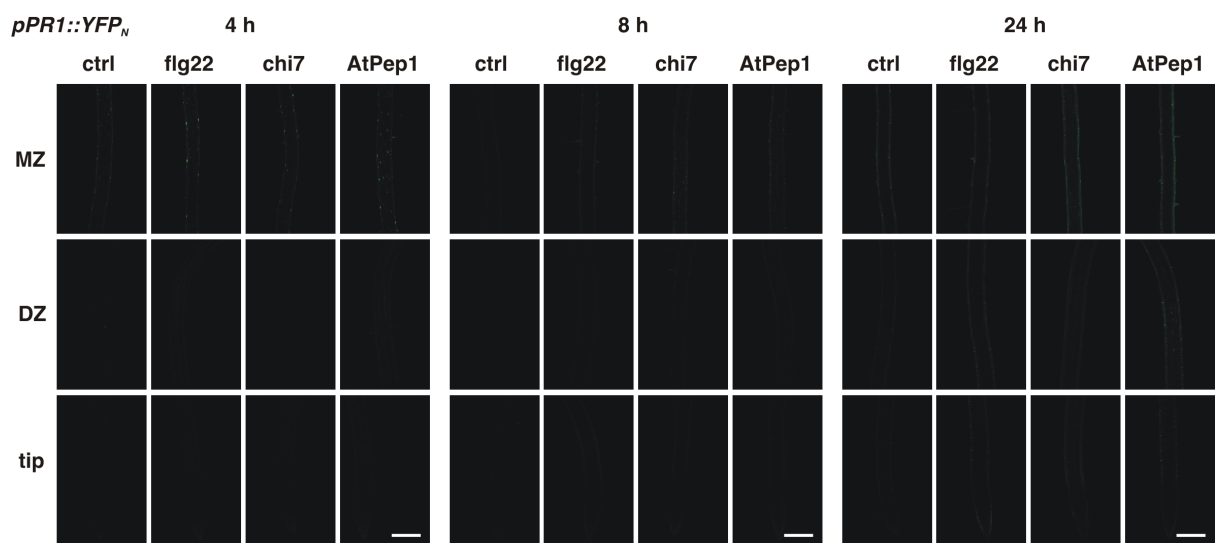

Supplement: pone.0185808.s002.pdf [file pone.0185808.s002.pdf]
