# Supplementary material for: In roots of Arabidopsis thaliana, the damage-associated molecular pattern AtPep1 is a stronger elicitor of immune signalling than flg22 or the chitin heptamer
Source: PubMed Central journal article supplement (PMC5626561; doi:10.1371/journal.pone.0185808), 2017-10-03
Supplement: pone.0185808.s003.pdf [file pone.0185808.s003.pdf]

**S2 Fig. AtPEPR2 determines root growth inhibition by AtPep1.**

Allele distribution of *pepr1* and *pepr2* in a segregating F2 population of a *pepr1 pepr2* cross with *promoter::YFP<sub>N</sub>* lines selected for loss of root inhibition on 0.5x MS containing 100 nM AtPep1. Numbers represent individual plants genotyped by PCR for the respective *pepr* T-DNA insertion.

|              | <i>pepr1</i> | <i>pepr2</i> |
|--------------|--------------|--------------|
| WT           | 14           | -            |
| heterozygous | 47           | 6            |
| homozygous   | 38           | 93           |
