# Supplementary material for: In roots of Arabidopsis thaliana, the damage-associated molecular pattern AtPep1 is a stronger elicitor of immune signalling than flg22 or the chitin heptamer
Source: PubMed Central journal article supplement (PMC5626561; doi:10.1371/journal.pone.0185808), 2017-10-03

**S4 Fig. Quantification of elicitor-triggered responses of defence-associated promoters in the root.** Quantification of microscopic analysis of *promoter::YFP<sub>N</sub>* constructs in two independent lines of 7-days old seedlings following treatment with 100 nM flg22, chi7, AtPep1 or 0.5x MS as control. Images were analysed using Fiji. Bars represent the mean of  $\geq 3$  images  $\pm$  SD. An asterisk indicates a mean of two values.

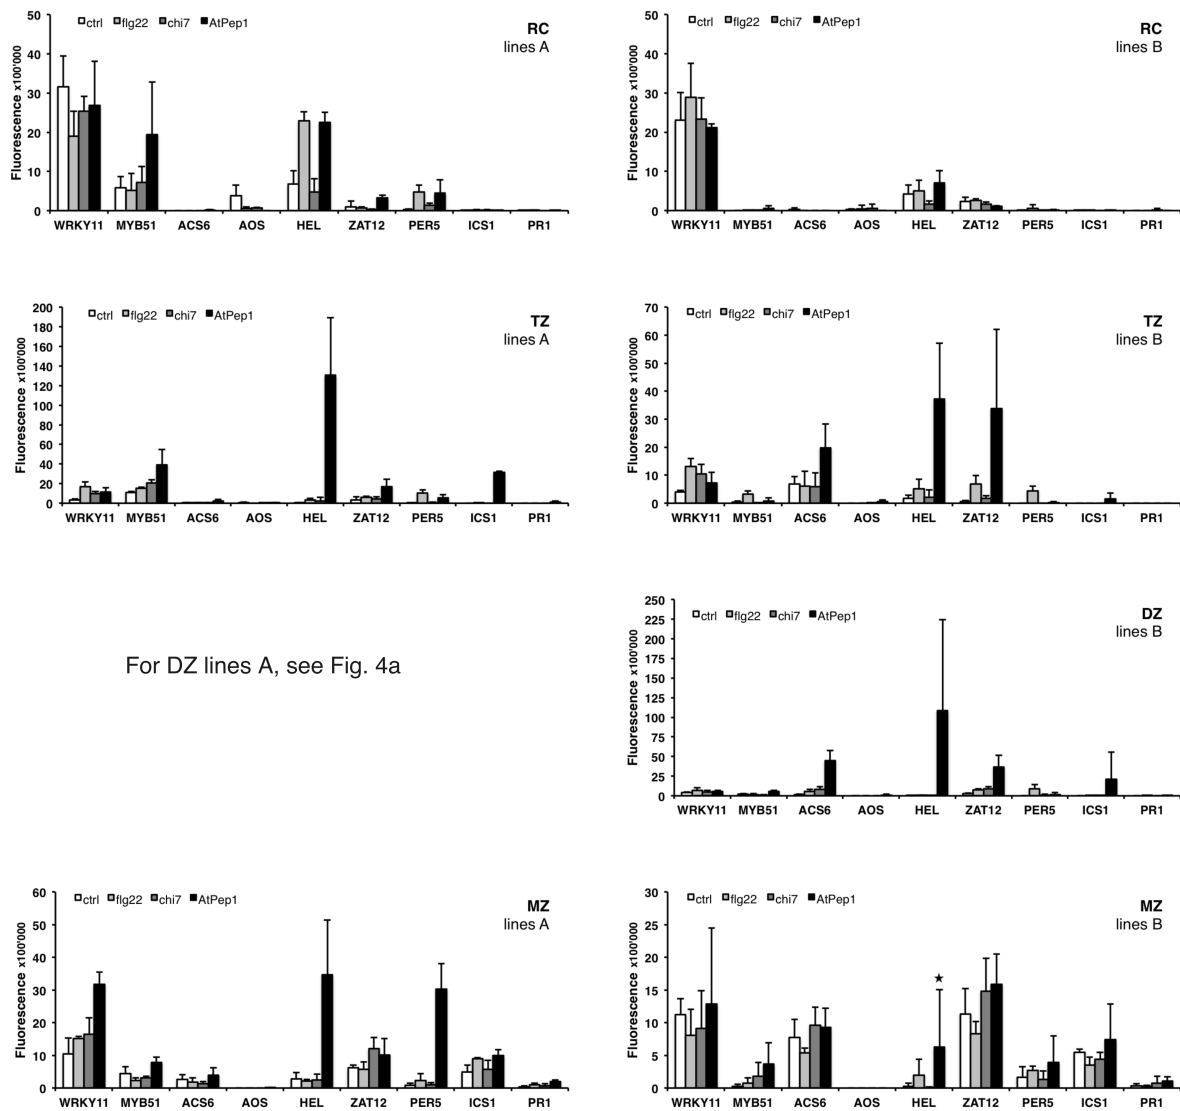

Supplement: pone.0185808.s005.pdf [file pone.0185808.s005.pdf]
