# Supplementary material for: In roots of Arabidopsis thaliana, the damage-associated molecular pattern AtPep1 is a stronger elicitor of immune signalling than flg22 or the chitin heptamer
Source: PubMed Central journal article supplement (PMC5626561; doi:10.1371/journal.pone.0185808), 2017-10-03
Supplement: pone.0185808.s006.pdf [file pone.0185808.s006.pdf]

**S5 Fig. Summary of elicitor-triggered responses and amplification settings used for microscopic analysis.** (a) Overview of inductive and suppressive responses of *promoter::YFP<sub>N</sub>* constructs expressed in 7-days old seedlings following treatment with 100 nM flg22, chi7, AtPep1 or 0.5x MS as control. Numbers represent the factors calculated as fold-change for 2 independent transformation lines per construct. A third line was analysed for *ACS6::YFP<sub>N</sub>* and *HEL::YFP<sub>N</sub>* constructs to confirm whether or not chi7 can cause a suppression of these markers. Black colour of a field indicates induction, white colour suppression and grey colour non-significant changes. (b) Table summarizing the amplification settings (gain) used for confocal microscopic analysis of *promoter::YFP<sub>N</sub>* constructs listed as an indicator for the expression level of the respective construct.

(a)  induction > 1.5     suppression < 0.67     no change

| fold-change | flg22                  |                        |                         |                        | chi7                   |                        |                        |                        | Pep1                   |                           |                            |                          |
|-------------|------------------------|------------------------|-------------------------|------------------------|------------------------|------------------------|------------------------|------------------------|------------------------|---------------------------|----------------------------|--------------------------|
|             | RC                     | TZ                     | DZ                      | MZ                     | RC                     | TZ                     | DZ                     | MZ                     | RC                     | TZ                        | DZ                         | MZ                       |
| WRKY11      | 0.60/<br>1.26          | 4.72/<br>3.30          | 2.03/<br>1.83           | 1.46/<br>0.72          | 0.80/<br>1.01          | 2.86/<br>2.64          | 1.34/<br>1.25          | 1.59/<br>0.81          | 0.85/<br>0.92          | 3.27/<br>1.84             | 3.73/<br>1.47              | 3.06/<br>1.14            |
| MYB51       | 0.88/<br>1.00/         | 1.38/<br>6.44/         | 1.72/<br>0.72/          | 0.50/<br>1.47/         | 1.24/<br>1.00/         | 1.86/<br>1.00/         | 1.53/<br>0.35/         | 0.69/<br>3.61/         | 3.34/<br>1.20/         | 3.54/<br>1.68/            | 6.31/<br>2.19/             | 1.77/<br>7.30/           |
| ACS6        | 1.00/<br>1.00/<br>1.24 | 1.00/<br>0.88/<br>1.98 | 10.83/<br>4.70/<br>1.19 | 0.67/<br>0.70/<br>0.71 | 1.00/<br>1.00/<br>1.90 | 1.00/<br>0.86/<br>1.52 | 6.02/<br>7.35/<br>1.97 | 0.48/<br>1.24/<br>0.59 | 1.00/<br>1.00/<br>1.89 | 4.61/<br>2.86/<br>2.01    | 29.41/<br>39.08/<br>9.19   | 1.50/<br>1.21/<br>1.10   |
| AOS         | 0.13/<br>1.00          | 1.00/<br>1.00          | 1.00/<br>1.00           | 1.00/<br>1.00          | 0.17/<br>1.25          | 1.00/<br>1.00          | 1.00/<br>1.00          | 1.00/<br>1.00          | 0.13/<br>1.00          | 1.00/<br>1.24             | 4.30/<br>1.76              | 1.00/<br>1.00            |
| HEL         | 3.39/<br>1.18/<br>0.57 | 7.04/<br>2.94/<br>1.98 | 7.56/<br>1.00/<br>2.05  | 0.73/<br>3.92/<br>1.29 | 0.70/<br>0.37/<br>0.24 | 4.38/<br>1.21/<br>0.95 | 1.00/<br>1.00/<br>0.39 | 0.85/<br>1.00/<br>0.42 | 3.34/<br>1.66/<br>1.09 | 260.97/<br>21.58/<br>4.91 | 764.64/<br>216.70/<br>6.79 | 12.14/<br>12.48/<br>1.44 |
| ZAT12       | 0.70/<br>1.08          | 1.76/<br>12.59         | 1.89/<br>2.50           | 0.92/<br>0.73          | 0.48/<br>0.73          | 1.24/<br>3.00          | 1.51/<br>2.98          | 1.97/<br>1.31          | 3.13/<br>0.44          | 4.88/<br>61.52            | 5.33/<br>12.60             | 1.65/<br>1.40            |
| PER5        | 9.66/<br>1.10          | 21.14/<br>8.85         | 21.34/<br>17.35         | 2.73/<br>1.62          | 2.76/<br>1.00          | 1.00/<br>1.00          | 2.10/<br>1.76          | 1.17/<br>0.81          | 8.87/<br>1.00          | 10.99/<br>1.00            | 11.08/<br>3.08             | 35.35/<br>2.34           |
| ICS1        | 1.00/<br>1.00          | 1.00/<br>1.00          | 1.00/<br>1.00           | 1.83/<br>0.65          | 1.00/<br>1.00          | 1.00/<br>1.00          | 1.00/<br>1.00          | 1.17/<br>0.81          | 1.00/<br>1.00          | 63.04/<br>3.26            | 27.70/<br>42.11            | 2.03/<br>1.37            |
| PR1         | 1.00/<br>1.00          | 1.00/<br>1.00          | 1.00/<br>1.00           | 1.94/<br>1.00          | 1.00/<br>1.00          | 1.00/<br>1.00          | 1.00/<br>1.00          | 1.24/<br>1.55          | 1.00/<br>1.00          | 2.03/<br>1.00             | 1.00/<br>1.00              | 3.93/<br>2.13            |

(b)

| Amplification | RC                   | TZ                   | DZ                   | MZ                  |
|---------------|----------------------|----------------------|----------------------|---------------------|
| WRKY11        | 700/<br>800          | 750/<br>800          | 800/<br>800          | 800/<br>800         |
| MYB51         | 1000/<br>1100        | 1100/<br>1200        | 1100/<br>1200        | 950/<br>1200        |
| ACS6          | 1000/<br>950/<br>950 | 1000/<br>950/<br>950 | 900/<br>775/<br>950  | 700/<br>650/<br>720 |
| AOS           | 1000/<br>1200        | 1000/<br>1200        | 1100/<br>1200        | 1100/<br>1200       |
| HEL           | 850/<br>850/<br>750  | 1100/<br>950/<br>900 | 1100/<br>950/<br>900 | 850/<br>800/<br>750 |
| ZAT12         | 750/<br>750          | 750/<br>850          | 700/<br>750          | 700/<br>800         |
| PER5          | 950/<br>1100         | 950/<br>1100         | 950/<br>1100         | 1100/<br>1100       |
| ICS1          | 1200/<br>1200        | 1200/<br>1200        | 1200/<br>1200        | 1200/<br>1200       |
| PR1           | 1200/<br>1200        | 1200/<br>1200        | 1200/<br>1200        | 1200/<br>1200       |
