# Supplementary material for: In roots of Arabidopsis thaliana, the damage-associated molecular pattern AtPep1 is a stronger elicitor of immune signalling than flg22 or the chitin heptamer
Source: PubMed Central journal article supplement (PMC5626561; doi:10.1371/journal.pone.0185808), 2017-10-03

**S6 Fig. Quantification of *promoter::YFP<sub>N</sub>* constructs at the infection site of roots invaded by *F. oxysporum*.**

(a) Quantification of microscopic analysis of *F. oxysporum* - infected roots expressing *promoter::YFP<sub>N</sub>* constructs in independent transformation lines when compared to Fig. 6. Bars represent the mean of  $\geq 6$  images  $\pm$  SE. (b) Quantification of microscopic analysis of *pHEL::YFP<sub>N</sub>*, *pPER5::YFP<sub>N</sub>* and *pICS1::YFP<sub>N</sub>* constructs using Fiji. Bars represent the mean of  $\geq 20$  images  $\pm$  SE. Statistical analysis was performed using a Student's t-test: \*  $p < 0.05$ , \*\*  $p < 0.01$ , \*\*\*  $p < 0.001$ . (b.t.) indicates that all signals were below the autofluorescence threshold.

**(a) infection site line B**

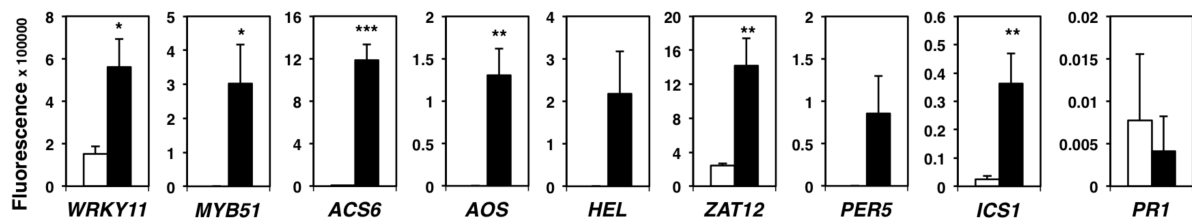

**(b) infection site n = 20**

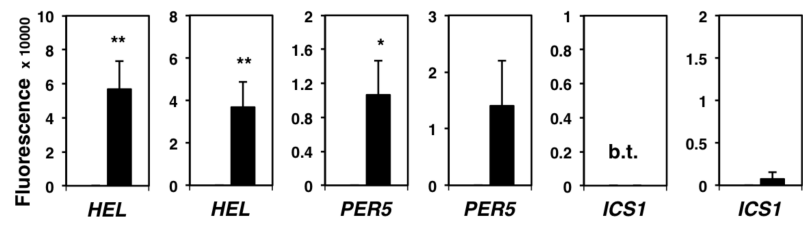

Supplement: pone.0185808.s007.pdf [file pone.0185808.s007.pdf]
