# Supplementary material for: In roots of Arabidopsis thaliana, the damage-associated molecular pattern AtPep1 is a stronger elicitor of immune signalling than flg22 or the chitin heptamer
Source: PubMed Central journal article supplement (PMC5626561; doi:10.1371/journal.pone.0185808), 2017-10-03

**S7 Fig. Induction of *promoter::YFP<sub>N</sub>* constructs adjacent to invading hyphae of GFP-labelled *F. oxysporum*.**

Microscopic analysis of the responses of 12-day old roots in the mature part 2 days after inoculation with spores from *F. oxysporum*. Fluorescence derived from *promoter::YFP<sub>N</sub>* constructs is localized in the root nuclei while fungal hyphae are green filamentous structures. Bar 100  $\mu\text{m}$ .

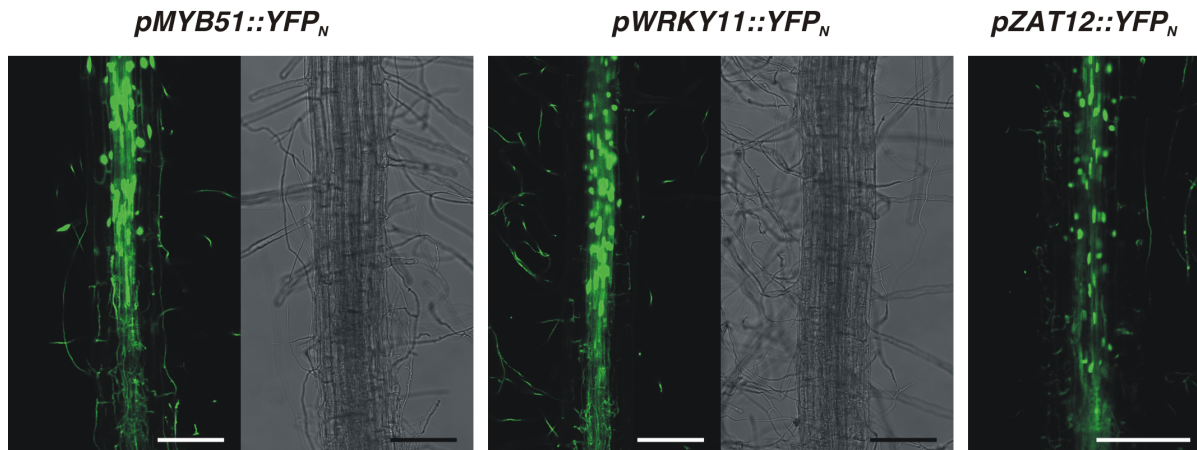

Supplement: pone.0185808.s008.pdf [file pone.0185808.s008.pdf]
