# Supplementary material for: In roots of Arabidopsis thaliana, the damage-associated molecular pattern AtPep1 is a stronger elicitor of immune signalling than flg22 or the chitin heptamer
Source: PubMed Central journal article supplement (PMC5626561; doi:10.1371/journal.pone.0185808), 2017-10-03

**S8 Fig. Expression of *promoter::YFP<sub>N</sub>* constructs in the mature part of roots infected with *F. oxysporum*.**

(a) Microscopic analysis of the responses of 12-day old roots in the mature part 2 days after inoculation with spores from *F. oxysporum*. Fluorescence derived from *promoter::YFP<sub>N</sub>* constructs is localized in the root nuclei and shown in green, while propidium iodide was used as a counterstain of cell walls and dead cells and is shown in red. Bar 100  $\mu$ m. (b) Quantification of microscopic analysis of *promoter::YFP<sub>N</sub>* constructs as depicted in (A) using Fiji. Bars represent the mean of  $\geq 6$  images  $\pm$  SE. (c) Quantification of microscopic analysis of *F. oxysporum* - infected roots expressing *promoter::YFP<sub>N</sub>* constructs in independent transformation lines when compared to Fig. 6A+B. Bars represent the mean of  $\geq 6$  images  $\pm$  SE. Statistical analysis was performed using a Student's t-test: \*  $p < 0.05$ , \*\*  $p < 0.01$ . (b.t.) indicates that all signals were below the autofluorescence threshold.

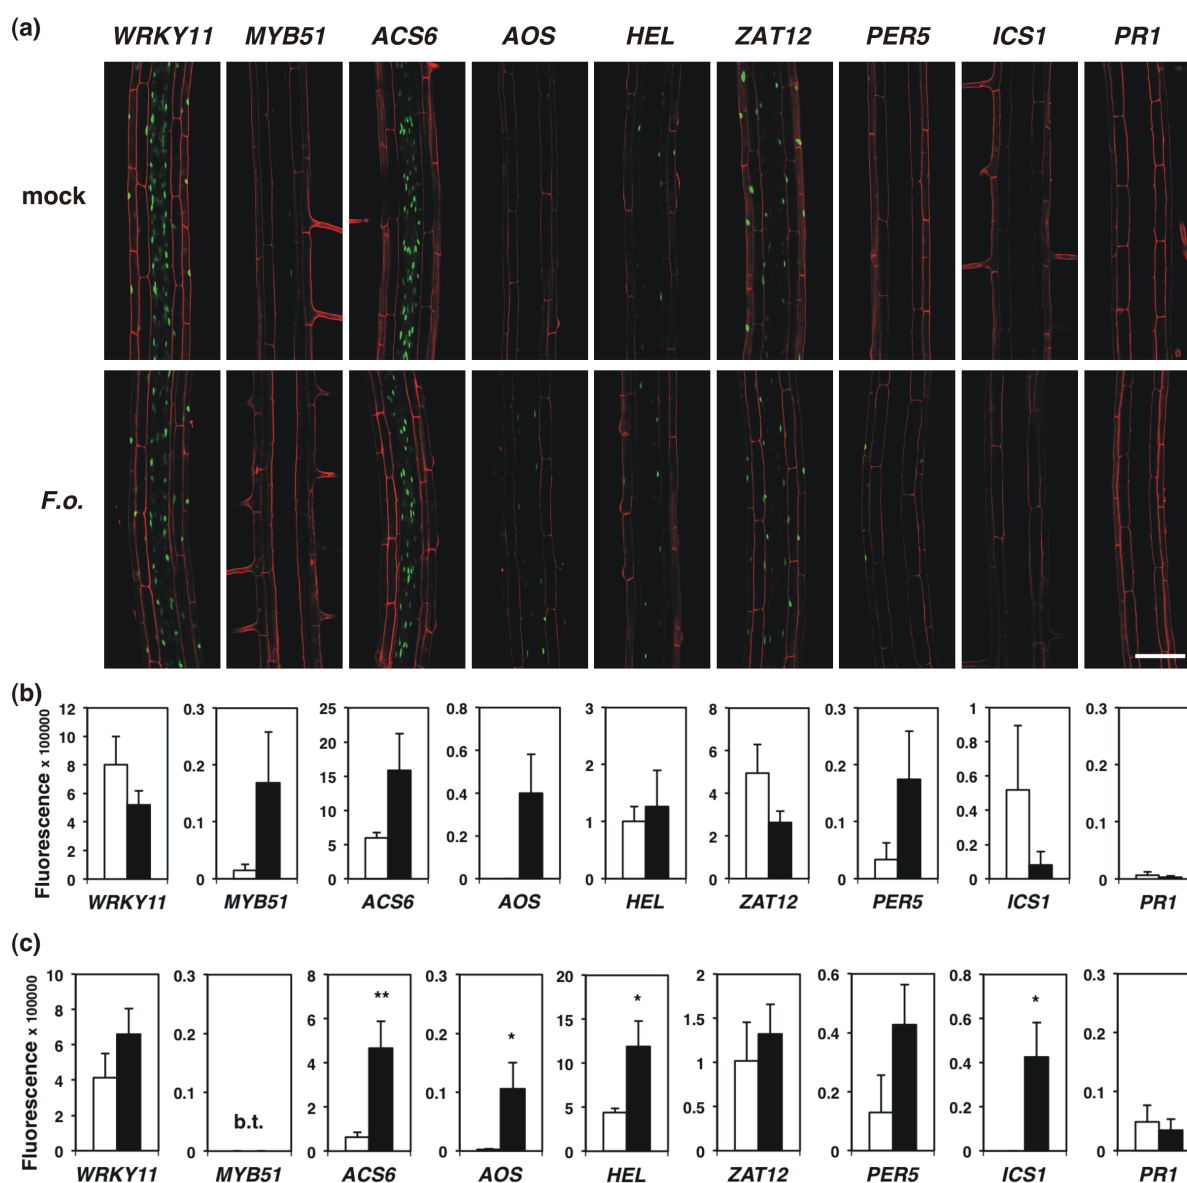

Supplement: pone.0185808.s009.pdf [file pone.0185808.s009.pdf]
