# Supplementary material for: In roots of Arabidopsis thaliana, the damage-associated molecular pattern AtPep1 is a stronger elicitor of immune signalling than flg22 or the chitin heptamer
Source: PubMed Central journal article supplement (PMC5626561; doi:10.1371/journal.pone.0185808), 2017-10-03

**S9 Fig. Expression of MAMP/DAMP receptor genes in roots.**  
 Data were obtained from a public database (Genevestigator).

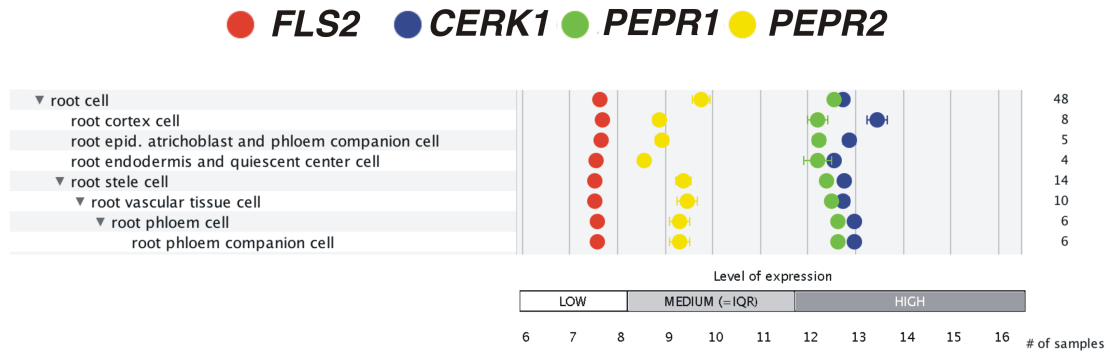

Supplement: pone.0185808.s010.pdf [file pone.0185808.s010.pdf]
